# Supplementary material for: Modelling the non-local thermodynamic equilibrium spectra of silylene (SiH2)
Source: Phys Chem Chem Phys. 2021 Apr 29;23(20):11990–2004. doi: 10.1039/d1cp00839k (PMC8153040; doi:10.1039/d1cp00839k)
Supplement: CP-023-D1CP00839K-s001 [file CP-023-D1CP00839K-s001.xlsx]

## Sheet: 1D populations
GM			LM-R			LM-L			TS-R			TS-L
v	Bend	Stretch	v	Bend	Stretch	v	Bend	Stretch	v	Bend	Stretch	v	Bend	Stretch
0	0.270666	0.0775825	0	0.581827	0.376631	0	0.258588	0.0706143	0	0.707787	0.508645	0	0.226925	0.0544975
1	0.333364	0.209629	1	0.308194	0.371691	1	0.329107	0.197894	1	0.223984	0.3578	1	0.316656	0.167791
2	0.224529	0.271255	2	0.0883926	0.179451	2	0.228897	0.265936	2	0.0546502	0.111287	2	0.239705	0.248531
3	0.109035	0.223473	3	0.0181397	0.0564716	3	0.114726	0.22787	3	0.0111288	0.019897	3	0.130026	0.235585
4	0.0425922	0.13143	4	0.00297602	0.0130211	4	0.0462354	0.139622	4	0.00203967	0.00221253	4	0.0564538	0.160355
5	0.0141824	0.0586284	5	0.000414065	0.00234457	5	0.015878	0.0650163	5	0.00034527	0.000152575	5	0.0208077	0.083349
6	0.00417108	0.020567	6	5.06632e-05	0.000343088	6	0.00481474	0.0238643	6	5.5084e-05	5.89862e-06	6	0.00675019	0.0343404
7	0.00110957	0.00580323	7	5.58581e-06	4.19255e-05	7	0.00132023	0.00706512	7	8.37708e-06	8.42942e-08	7	0.0019747	0.0114876
8	0.000271523	0.00133516	8	5.64663e-07	4.36282e-06	8	0.000332949	0.00171135	8	1.22511e-06	8.42611e-11	8	0.000530008	0.00316938
9	6.18948e-05	0.000252213	9	5.30172e-08	3.92278e-07	9	7.82024e-05	0.000341823	9	1.73339e-07	1.97274e-10	9	0.000132202	0.00072819
10	1.32704e-05	3.9151e-05	10	4.66971e-09	3.08167e-08	10	1.72732e-05	5.64214e-05	10	2.38414e-08	1.12895e-11	10	3.09506e-05	0.000140006
11	2.69653e-06	4.96535e-06	11	3.88888e-10	2.13344e-09	11	3.61532e-06	7.6675e-06	11	3.19933e-09	8.29906e-14	11	6.85434e-06	2.25326e-05
12	5.22489e-07	5.0703e-07	12	3.08161e-11	1.31032e-10	12	7.21459e-07	8.48379e-07	12	4.20111e-10	4.24544e-15	12	1.445e-06	3.02129e-06
13	9.70255e-08	4.04921e-08	13	2.33569e-12	7.17657e-12	13	1.37962e-07	7.47286e-08	13	5.41099e-11	7.16291e-16	13	2.9149e-07	3.3373e-07
14	1.73402e-08	2.38646e-09	14	1.7007e-13	3.51875e-13	14	2.53872e-08	5.01714e-09	14	6.84954e-12	1.13311e-17	14	5.65083e-08	2.97249e-08
15	2.99307e-09	9.07822e-11	15	1.19403e-14	1.54881e-14	15	4.51149e-09	2.34092e-10	15	8.53562e-13	1.26267e-19	15	1.05662e-08	2.05105e-09
16	5.0048e-10	1.41378e-12	16	8.10844e-16	6.13077e-16	16	7.76584e-10	5.88473e-12	16	1.0486e-13	4.46006e-20	16	1.9116e-09	1.00988e-10
17	8.1282e-11	3.45406e-15	17	5.34042e-17	2.18411e-17	17	1.29824e-10	1.54022e-14	17	1.27149e-14	8.12409e-22	17	3.35518e-10	2.86551e-12
18	1.28506e-11	7.98814e-15	18	3.41941e-18	7.0012e-19	18	2.11254e-11	7.70065e-15	18	1.52334e-15	8.83452e-24	18	5.72651e-11	1.58146e-14
19	1.98167e-12	9.24604e-16	19	2.13287e-19	2.01661e-20	19	3.35275e-12	1.65711e-15	19	1.8049e-16	3.01127e-24	19	9.52379e-12	2.1413e-15
20	2.98595e-13	3.78864e-17	20	1.29839e-20	5.20547e-22	20	5.19881e-13	1.05631e-16	20	2.11659e-17	4.1596e-26	20	1.54618e-12	6.43355e-16
21	4.40296e-14	2.47412e-19	21	7.72639e-22	1.19894e-23	21	7.88843e-14	2.10422e-18	21	2.45839e-18	1.13681e-27	21	2.45438e-13	4.9791e-17
22	6.36243e-15	2.96934e-20	22	4.50101e-23	2.44802e-25	22	1.1729e-14	4.17549e-21	22	2.82989e-19	2.06978e-28	22	3.81483e-14	1.39796e-18
23	9.02102e-16	7.58695e-21	23	2.57026e-24	4.39737e-27	23	1.71104e-15	1.09901e-20	23	3.23028e-20	1.17043e-30	23	5.81324e-15	7.14755e-22
24	1.2564e-16	3.80354e-22	24	1.44066e-25	6.87861e-29	24	2.45174e-16	1.03392e-21	24	3.65831e-21	1.87811e-31	24	8.69514e-16	3.42159e-21
25	1.72059e-17	2.22685e-24	25	7.93484e-27	8.65477e-31	25	3.45414e-17	2.31234e-23	25	4.11235e-22	9.11009e-33	25	1.27793e-16	4.87003e-22
26	2.31904e-18	3.86042e-25	26	4.28981e-28	1.28689e-33	26	4.7892e-18	6.24639e-26	26	4.59038e-23	1.40112e-33	26	1.84723e-17	1.7815e-23
27	3.0788e-19	7.89271e-26	27	2.2651e-29	5.46677e-35	27	6.54041e-19	1.25449e-25	27	5.09007e-24	5.73402e-35	27	2.62843e-18	2.30269e-26
28	4.0293e-20	2.70721e-27	28	1.1367e-30	4.03266e-33	28	8.80445e-20	9.54995e-27	28	5.60792e-25	8.14887e-34	28	3.68454e-19	3.73897e-26
29	5.20188e-21	3.99062e-33	29	7.71894e-32	1.94224e-33	29	1.16913e-20	1.0314e-28	29	6.14474e-26	8.7179e-34	29	5.0921e-20	5.1484e-27

## Sheet: LMR
Gamma	NN	E-ZPE, cm-1	v1	v2	v3	Density	Density
A1	1	0	0	0	0	0.887549	0.787744
A1	2	998.608	0	0	1	0.200142	0.0400569
A1	3	1978.35	0	0	2	0.32618	0.106393
B2	4	1993	0	1	0	0	0
A1	5	2005.54	1	0	0	-0.0423356	0.0017923
A1	6	2951.68	0	0	3	0.10684	0.0114147
B2	7	2974.73	0	1	1	0	0
A1	8	2998.78	1	0	1	-0.0540912	0.00292586
A1	9	3907.79	2	0	0	-0.180838	0.0327025
B2	10	3913.39	0	2	0	0	0
A1	11	3923.64	2	0	0	-0.0187402	0.000351195
B2	12	3952.47	0	1	2	0	0
A1	13	3975.99	1	1	0	0.040899	0.00167273
A1	14	3996.33	1	1	0	0.0402658	0.00162134
A1	15	4861.11	1	0	3	0.0575389	0.00331072
B2	16	4873.17	0	2	1	0	0
A1	17	4889.76	2	0	1	-0.0154842	0.000239761
B2	18	4924.73	0	1	3	0	0
A1	19	4941.7	1	1	1	-0.0241655	0.000583971
A1	20	4978.54	1	0	3	0.025242	0.000637158
A1	21	5768.07	0	3	0	-0.0053722	2.88606e-05
B2	22	5768.23	0	3	0	0	0
A1	23	5805.81	1	0	4	-0.0589939	0.00348029
B2	24	5825.27	0	2	2	0	0
A1	25	5848.65	2	0	2	-0.0141488	0.000200189
A1	26	5888.69	1	1	2	0.00712123	5.07119e-05
B2	27	5889.45	0	1	4	0	0
B2	28	5911.15	2	1	0	0	0
A1	29	5912.98	1	2	0	0.0307032	0.000942686
A1	30	5956.65	1	0	4	0.0158876	0.000252417
A1	31	6710.83	0	3	1	-0.00810691	6.5722e-05
B2	32	6711.68	0	3	1	0	0
A1	33	6742.71	1	0	5	0.0282069	0.000795629
B2	34	6770.28	0	2	3	0	0
A1	35	6799.86	2	0	3	-0.00436505	1.90537e-05
A1	36	6830.3	1	1	3	-0.00901345	8.12423e-05
B2	37	6843.9	0	1	5	0	0
B2	38	6865.35	2	1	1	0	0
A1	39	6871.13	1	2	1	-0.0128351	0.00016474
A1	40	6927.95	1	0	5	-0.0125653	0.000157887
A1	41	7554.39	0	4	0	-0.0198259	0.000393065
B2	42	7554.39	0	4	0	0	0
A1	43	7642.6	0	3	2	0.00807383	6.51868e-05
B2	44	7645.71	0	3	2	0	0
A1	45	7672.75	1	0	6	-0.0206643	0.000427015
B2	46	7708.28	0	2	4	0	0
A1	47	7740.73	2	0	4	-0.00394013	1.55247e-05
A1	48	7749.7	1	3	0	-0.00445807	1.98743e-05
B2	49	7754.76	3	1	0	0	0
A1	50	7770.5	1	1	4	-0.00802392	6.43833e-05
B2	51	7788.84	0	1	6	0	0
A1	52	7813.91	2	2	0	0.0178708	0.000319366
B2	53	7817.65	2	1	2	0	0
A1	54	7834.51	2	2	0	0.00115398	1.33167e-06
A1	55	7892.36	1	0	6	0.00871974	7.60338e-05
A1	56	8481.19	0	4	1	0.00326851	1.06831e-05
B2	57	8481.2	0	4	1	0	0
A1	58	8562.82	0	3	3	0.008811	7.76337e-05
B2	59	8570.64	0	3	3	0	0
A1	60	8596.63	0	3	3	-0.0109818	0.0001206
B2	61	8639.02	0	2	5	0	0
A1	62	8664.62	1	2	3	-0.00307009	9.42546e-06
A1	63	8681.32	2	0	5	0.00142032	2.0173e-06
B2	64	8682.62	3	1	1	0	0
A1	65	8706.39	1	1	5	0.00530651	2.8159e-05
B2	66	8725.99	0	1	7	0	0
A1	67	8745.08	2	2	1	0.0056976	3.24626e-05
B2	68	8764.63	2	1	3	0	0
A1	69	8780.1	2	2	1	0.00409116	1.67376e-05
A1	70	8849.34	1	0	7	-0.00643313	4.13851e-05
A1	71	9272.79	5	0	0	-0.00779832	6.08139e-05
B2	72	9272.79	5	0	0	0	0
A1	73	9398.89	0	4	2	-0.00738565	5.45479e-05
B2	74	9398.94	0	4	2	0	0
A1	75	9471.66	0	3	4	0.00485987	2.36183e-05
B2	76	9486.61	0	3	4	0	0
A1	77	9513.96	0	3	4	-0.00735026	5.40263e-05
A1	78	9534.71	1	4	0	0.00208167	4.33335e-06
B2	79	9535.43	4	1	0	0	0
B2	80	9562.04	0	2	6	0	0
A1	81	9576.55	1	2	4	0.00162225	2.6317e-06
B2	82	9603.05	3	1	2	0	0
A1	83	9606.01	2	0	6	0.00258173	6.66535e-06
A1	84	9635.37	1	1	6	-0.00517429	2.67733e-05
A1	85	9652.17	2	3	0	0.00139274	1.93973e-06
B2	86	9654.85	0	1	8	0	0
A1	87	9673.52	2	2	2	-0.00729029	5.31483e-05
B2	88	9686.16	3	2	0	0	0
B2	89	9705.21	2	1	4	0	0
A1	90	9720.36	2	2	2	0.00242326	5.87216e-06
A1	91	9798.51	1	0	8	-0.00439094	1.92804e-05
A1	92	10181.6	5	0	1	0.000831847	6.91969e-07
B2	93	10181.6	5	0	1	0	0
A1	94	10307.5	0	4	3	-0.00223242	4.98371e-06
B2	95	10307.7	0	4	3	0	0
A1	96	10369.8	1	0	9	-0.00516133	2.66394e-05
B2	97	10393.7	0	3	5	0	0
A1	98	10423.6	0	3	5	-0.0042364	1.79471e-05
A1	99	10444	1	4	1	0.000455876	2.07823e-07
B2	100	10445.7	4	1	1	0	0
B2	101	10476.7	0	1	9	0	0
A1	102	10480.2	1	2	5	0.00162292	2.63388e-06
B2	103	10516.7	3	1	3	0	0
A1	104	10520.9	1	3	3	-0.00159888	2.55642e-06
A1	105	10553.5	2	3	1	-0.00259031	6.70969e-06
A1	106	10567.6	2	2	3	0.000954835	9.11709e-07
B2	107	10574.2	0	1	9	0	0
A1	108	10594	2	3	1	0.00303069	9.18509e-06
B2	109	10603	3	2	1	0	0
B2	110	10638.2	2	1	5	0	0
A1	111	10652.9	2	2	3	-0.00195215	3.81089e-06
A1	112	10739.5	1	1	7	0.00327298	1.07124e-05
A1	113	10924.6	0	6	0	-0.00536014	2.87311e-05
B2	114	10924.6	0	6	0	0	0
A1	115	11081.7	5	0	2	-0.00295173	8.71274e-06
B2	116	11081.7	5	0	2	0	0
A1	117	11206.5	0	4	4	-0.00348764	1.21636e-05
B2	118	11207.2	0	4	4	0	0
A1	119	11248.1	1	5	0	0.000985787	9.71777e-07
B2	120	11248.2	1	5	0	0	0
A1	121	11257.8	1	0	10	0.00180304	3.25094e-06
B2	122	11291.8	0	3	6	0	0
A1	123	11323.9	0	3	6	-0.00327191	1.07054e-05
A1	124	11342.5	1	4	2	0.000822833	6.77054e-07
B2	125	11346.7	4	1	2	0	0
A1	126	11377.1	1	2	6	-0.000919418	8.4533e-07
B2	127	11382.2	0	1	10	0	0
A1	128	11422.6	2	4	0	0.000784273	6.15084e-07
B2	129	11423.7	3	1	4	0	0
A1	130	11431	2	4	0	-0.00233677	5.4605e-06
B2	131	11446.9	4	2	0	0	0
A1	132	11461.7	2	3	2	0.00246399	6.07126e-06
A1	133	11482.8	2	2	4	-0.00129977	1.68941e-06
B2	134	11483.4	0	1	10	0	0
A1	135	11504.2	2	3	2	-0.00394621	1.55726e-05
B2	136	11515.7	3	2	2	0	0
A1	137	11527.6	3	3	0	-0.000163949	2.68793e-08
B2	138	11563.2	2	1	6	0	0
A1	139	11577.3	2	2	4	0.00149267	2.22808e-06
A1	140	11671.8	1	1	8	-0.00227082	5.15663e-06
A1	141	11814.5	0	6	1	0.000483052	2.33339e-07
B2	142	11814.5	0	6	1	0	0
B2	143	11973.3	5	0	3	0	0
A1	144	11973.3	5	0	3	-0.000405858	1.6472e-07
A1	145	12095	0	4	5	-0.00161115	2.59582e-06
B2	146	12097.3	0	4	5	0	0
A1	147	12136.2	1	0	11	-0.00241434	5.82904e-06
A1	148	12140.6	1	5	1	0.00026888	7.22966e-08
B2	149	12140.6	1	5	1	0	0
B2	150	12180.8	0	2	9	0	0
A1	151	12212.8	0	3	7	-0.00201816	4.07296e-06
A1	152	12231.3	1	4	3	7.61211e-05	5.79442e-09
B2	153	12238.6	4	1	3	0	0
A1	154	12267.7	1	4	3	0.000590208	3.48345e-07
B2	155	12278.1	0	1	11	0	0
A1	156	12311.1	2	4	1	-0.00109519	1.19945e-06
B2	157	12323.6	3	1	5	0	0
A1	158	12326.4	2	4	1	0.000522115	2.72604e-07
B2	159	12341.9	4	2	1	0	0
A1	160	12362.3	1	1	9	0.000905611	8.20131e-07
B2	161	12383.1	0	1	11	0	0
A1	162	12391.9	2	2	5	-0.000793133	6.2906e-07
A1	163	12402.5	3	3	1	0.00140019	1.96053e-06
B2	164	12422.5	3	2	3	0	0
A1	165	12429.6	3	3	1	0.000942213	8.87766e-07
B2	166	12479.8	2	1	7	0	0
A1	167	12493	2	2	5	-0.000847218	7.17779e-07
A1	168	12510.8	0	7	0	0.0033465	1.1199e-05
B2	169	12510.8	0	7	0	0	0
A1	170	12595	1	1	9	0.0016781	2.81603e-06
A1	171	12696.2	0	6	2	0.00202765	4.11136e-06
B2	172	12696.2	0	6	2	0	0
B2	173	12856.2	5	0	4	0	0
A1	174	12856.2	5	0	4	0.00139005	1.93225e-06
A1	175	12893.1	1	6	0	-0.000692787	4.79954e-07
B2	176	12893.2	1	6	0	0	0
A1	177	12970.9	0	4	6	-0.00177422	3.14784e-06
B2	178	12977.4	0	4	6	0	0
A1	179	13006.4	0	4	6	0.000200291	4.01165e-08
A1	180	13023.7	1	5	2	-0.000449722	2.0225e-07
B2	181	13023.9	1	5	2	0	0
B2	182	13060.5	0	2	10	0	0
A1	183	13088.4	1	3	6	0.00153661	2.36118e-06
A1	184	13111.8	1	4	4	0.000910576	8.29149e-07
B2	185	13121.7	4	1	4	0	0
A1	186	13141	5	2	0	-0.000892244	7.96099e-07
B2	187	13146.8	2	5	0	0	0
A1	188	13151.2	1	4	4	-0.000389097	1.51396e-07
B2	189	13163.9	0	1	12	0	0
A1	190	13190.3	2	3	4	-0.00068707	4.72065e-07
A1	191	13211.3	2	4	2	0.000667573	4.45654e-07
B2	192	13215.2	2	1	8	0	0
B2	193	13230.6	4	2	2	0	0
A1	194	13250.5	4	3	0	0.00112236	1.25969e-06
A1	195	13259.8	4	3	0	-0.00101004	1.02018e-06
B2	196	13273.2	0	1	12	0	0
A1	197	13290.1	3	3	2	-0.00145383	2.11363e-06
A1	198	13293.9	1	3	6	-0.00140316	1.96885e-06
B2	199	13320	3	2	4	0	0
B2	200	13326.2	3	4	0	0	0
A1	201	13326.4	3	3	2	-0.000892946	7.97352e-07
A1	202	13381.4	0	7	1	-0.000176113	3.10157e-08
B2	203	13381.4	0	7	1	0	0
B2	204	13387.5	2	1	8	0	0
A1	205	13399.4	2	2	6	-0.000835537	6.98123e-07
A1	206	13508.7	1	1	10	0.00119995	1.43988e-06
A1	207	13569.7	0	6	3	0.000230352	5.30619e-08
B2	208	13569.7	0	6	3	0	0
A1	209	13730.2	5	0	5	-0.000134466	1.8081e-08
B2	210	13730.2	5	0	5	0	0
A1	211	13766.6	1	6	1	0.000230862	5.32971e-08
B2	212	13766.6	1	6	1	0	0
A1	213	13831.5	0	4	7	0.00124535	1.5509e-06
B2	214	13847.1	0	4	7	0	0
A1	215	13869.8	0	4	7	0.000822589	6.76652e-07
A1	216	13897.6	1	5	3	-0.000181977	3.31156e-08
B2	217	13898.2	1	5	3	0	0
B2	218	13930.4	0	2	11	0	0
A1	219	13951.5	1	3	7	-0.000974679	9.49999e-07
A1	220	13983.1	0	3	9	0.000281452	7.92154e-08
B2	221	13995.8	4	1	5	0	0
A1	222	14013.5	5	2	1	-1.75723e-05	3.08784e-10
B2	223	14021.8	2	5	1	0	0
A1	224	14026.3	1	4	5	-0.00030427	9.25805e-08
A1	225	14032.3	0	8	0	0.00219531	4.81938e-06
B2	226	14032.3	0	8	0	0	0
B2	227	14039.1	0	1	13	0	0
A1	228	14062.9	2	3	5	0.000609566	3.7157e-07
A1	229	14085.2	2	4	3	-0.000393811	1.55087e-07
B2	230	14097.1	4	2	3	0	0
B2	231	14113.8	4	2	3	0	0
A1	232	14128	4	3	1	0.000251078	6.30402e-08
A1	233	14144.6	4	3	1	0.000307366	9.4474e-08
B2	234	14153.3	0	1	13	0	0
A1	235	14169.3	3	3	3	-0.000524644	2.75251e-07
A1	236	14186.7	2	2	7	0.000520964	2.71403e-07
B2	237	14200.8	3	4	1	0	0
A1	238	14215.2	3	3	3	-0.000602829	3.63403e-07
B2	239	14215.2	3	2	5	0	0
A1	240	14244.3	0	7	2	-0.00128353	1.64744e-06
B2	241	14244.3	0	7	2	0	0
B2	242	14285.9	2	1	9	0	0
A1	243	14296.2	2	2	7	-0.000342196	1.17098e-07
A1	244	14412.3	1	2	9	0.000864123	7.46709e-07
B2	245	14435	0	6	4	0	0
A1	246	14435	0	6	4	-0.000970231	9.41347e-07
A1	247	14471.1	7	1	0	0.000453147	2.05342e-07
B2	248	14471.2	7	1	0	0	0
A1	249	14594.9	5	0	6	0.000688719	4.74334e-07
B2	250	14594.9	5	0	6	0	0
B2	251	14631.2	1	6	2	0	0
A1	252	14631.2	1	6	2	-0.000253152	6.40861e-08
A1	253	14676.1	1	0	14	0.000797842	6.36551e-07
B2	254	14706	0	4	8	0	0
A1	255	14725.9	0	4	8	0.000245535	6.02875e-08
A1	256	14761.8	1	5	4	0.000243052	5.90744e-08
B2	257	14763.3	1	5	4	0	0
A1	258	14780.7	6	2	0	0.00067482	4.55382e-07
B2	259	14781.9	2	6	0	0	0
B2	260	14790.2	0	2	12	0	0
A1	261	14803.7	0	0	16	-0.000796323	6.3413e-07
A1	262	14843.8	0	3	10	-0.000570927	3.25957e-07
B2	263	14861.1	4	1	6	0	0
A1	264	14874.3	5	2	2	-0.000306514	9.3951e-08
B2	265	14883.6	0	8	1	0	0
A1	266	14883.6	0	8	1	-2.21049e-05	4.88628e-10
B2	267	14888	2	5	2	0	0
A1	268	14891.3	5	2	2	-0.000163025	2.6577e-08
B2	269	14903.6	0	1	14	0	0
A1	270	14929.2	1	4	6	-0.000309803	9.59782e-08
A1	271	14938.8	4	4	0	-9.54575e-05	9.11214e-09
A1	272	14948.6	2	4	4	0.000191392	3.66308e-08
B2	273	14969.1	4	2	4	0	0
B2	274	14988.5	5	3	0	0	0
B2	275	14991.6	5	3	0	0	0
A1	276	14997.9	4	3	2	-0.000659595	4.35066e-07
A1	277	15020.4	4	3	2	-0.000880718	7.75664e-07
B2	278	15022.8	0	1	14	0	0
A1	279	15039.5	3	3	4	0.00076321	5.8249e-07
A1	280	15071	2	2	8	-0.000511049	2.61171e-07
B2	281	15072.7	3	4	2	0	0
A1	282	15091.4	4	4	0	0.000198717	3.94883e-08
A1	283	15096.9	4	4	0	0.000545616	2.97697e-07
B2	284	15097.6	3	2	6	0	0
A1	285	15099.6	0	7	3	5.73947e-05	3.29415e-09
B2	286	15099.7	0	7	3	0	0
B2	287	15174.7	2	1	10	0	0
A1	288	15182.7	2	3	6	0.000465634	2.16815e-07
A1	289	15292	0	6	5	9.82744e-05	9.65785e-09
B2	290	15292	0	6	5	0	0
A1	291	15305.4	1	2	10	0.000638558	4.07756e-07
A1	292	15324.9	7	1	1	0.000173433	3.00789e-08
B2	293	15324.9	7	1	1	0	0
A1	294	15449.8	5	0	7	-2.03196e-05	4.12885e-10
B2	295	15450.1	5	0	7	0	0
B2	296	15487.1	1	6	3	0	0
A1	297	15487.1	1	6	3	-0.000240295	5.77418e-08
B2	298	15490.3	9	0	0	0	0
A1	299	15490.3	9	0	0	-0.0014636	2.14211e-06
A1	300	15506.6	1	0	15	0.000732868	5.37096e-07
B2	301	15553.7	0	3	11	0	0
A1	302	15572.4	0	4	9	0.000323658	1.04755e-07
A1	303	15615.4	1	5	5	-7.187e-05	5.1653e-09
B2	304	15618.9	1	5	5	0	0
A1	305	15635.8	6	2	1	-7.47785e-05	5.59183e-09
B2	306	15637.3	2	6	1	0	0
B2	307	15639.6	0	2	13	0	0
A1	308	15646.5	0	0	17	0.000484552	2.34791e-07
A1	309	15693.2	2	4	5	0.000153635	2.36038e-08
B2	310	15717.2	3	1	9	0	0
A1	311	15724.8	5	2	3	0.00011926	1.4223e-08
B2	312	15728.2	0	8	2	0	0
A1	313	15728.3	0	8	2	0.000820164	6.72669e-07
A1	314	15745.2	5	2	3	0.000230387	5.30782e-08
B2	315	15745.6	2	5	3	0	0
B2	316	15757.1	0	1	15	0	0
A1	317	15787.8	1	4	7	-0.000320603	1.02786e-07
A1	318	15796.3	4	4	1	-0.000206544	4.26603e-08
A1	319	15802.7	4	3	3	0.000138699	1.92373e-08
B2	320	15831.2	4	2	5	0	0
B2	321	15847.8	5	3	1	0	0
A1	322	15858.9	4	3	3	-0.000105798	1.11933e-08
B2	323	15860.9	4	1	7	0	0
B2	324	15881.4	0	1	15	0	0
A1	325	15884.4	4	3	3	0.000207966	4.32497e-08
A1	326	15902.7	3	3	5	-0.00017758	3.15348e-08
B2	327	15937.3	3	4	3	0	0
A1	328	15945.7	2	2	9	1.39531e-05	1.94688e-10
B2	329	15947.8	0	7	4	0	0
A1	330	15948.3	0	7	4	-0.000662035	4.38291e-07
A1	331	15951.6	4	4	1	-0.000176334	3.10939e-08
A1	332	15966.5	3	3	5	0.000280348	7.85952e-08
B2	333	15970.9	3	2	7	0	0
A1	334	15983.1	8	1	0	-0.000301218	9.07321e-08
B2	335	15983.1	8	1	0	0	0
B2	336	16053.4	2	1	11	0	0
A1	337	16058.7	2	3	7	0.000137595	1.89323e-08
A1	338	16141.1	0	6	6	0.00047802	2.28503e-07
B2	339	16141.1	0	6	6	0	0
A1	340	16170.4	7	1	2	-0.000157356	2.47608e-08
B2	341	16170.4	7	1	2	0	0
A1	342	16187.7	1	2	11	0.000478437	2.28902e-07
A1	343	16294.6	5	0	8	-0.000299652	8.97911e-08
B2	344	16296	5	0	8	0	0
A1	345	16323.1	9	0	1	6.10815e-05	3.73095e-09
B2	346	16323.1	9	0	1	0	0
A1	347	16324.4	0	0	18	-0.000387485	1.50144e-07
A1	348	16335.4	1	6	4	9.78565e-05	9.5759e-09
B2	349	16335.4	1	6	4	0	0
A1	350	16349.6	2	7	0	-0.000429909	1.84822e-07
B2	351	16349.9	7	2	0	0	0
B2	352	16390.9	0	3	12	0	0
A1	353	16408.2	0	0	18	0.000133064	1.77061e-08
A1	354	16457.8	1	5	6	-0.000189215	3.58024e-08
B2	355	16464.6	1	5	6	0	0
B2	356	16480.4	0	4	10	0	0
A1	357	16480.5	6	2	2	-0.000433151	1.8762e-07
A1	358	16482.9	6	2	2	-0.000246596	6.08096e-08
B2	359	16483.7	2	6	2	0	0
A1	360	16532.9	2	4	6	0.000267671	7.1648e-08
B2	361	16564.6	3	1	10	0	0
A1	362	16564.9	3	6	0	-0.000184362	3.39892e-08
A1	363	16568.9	0	8	3	3.35062e-06	1.12267e-11
B2	364	16569.1	0	8	3	0	0
A1	365	16569.8	3	6	0	7.18949e-05	5.16887e-09
A1	366	16589.2	1	1	14	2.57384e-05	6.62465e-10
B2	367	16595.1	2	5	4	0	0
B2	368	16597.9	6	3	0	0	0
B2	369	16601.7	0	1	16	0	0
A1	370	16636.9	1	4	8	0.000117732	1.38609e-08
A1	371	16644.4	4	4	2	-4.64217e-06	2.15497e-11
A1	372	16653	4	3	4	-0.000146549	2.14766e-08
B2	373	16684	4	2	6	0	0
B2	374	16700.1	5	3	2	0	0
A1	375	16708	4	5	0	-0.000153429	2.35406e-08
A1	376	16713.2	4	5	0	0.000441007	1.94487e-07
B2	377	16723	4	1	8	0	0
B2	378	16730.6	3	2	8	0	0
A1	379	16735.6	4	3	4	-0.000629216	3.95913e-07
A1	380	16761.1	3	3	6	-8.83472e-05	7.80523e-09
A1	381	16793	0	7	5	-1.72805e-05	2.98614e-10
B2	382	16793	0	7	5	0	0
B2	383	16794.5	3	4	4	0	0
A1	384	16804	4	4	2	-7.70657e-05	5.93912e-09
A1	385	16813.1	2	2	10	-0.000278269	7.74336e-08
A1	386	16817.2	8	1	1	-9.00377e-05	8.10679e-09
B2	387	16817.2	8	1	1	0	0
A1	388	16827.7	3	3	6	0.000292373	8.54817e-08
B2	389	16828.3	5	4	0	0	0
B2	390	16835.5	3	2	8	0	0
A1	391	16885.8	10	0	0	0.0010095	1.01908e-06
B2	392	16885.8	10	0	0	0	0
B2	393	16922.9	2	1	12	0	0
A1	394	16925.1	2	3	8	-0.000268134	7.18957e-08
A1	395	16986.4	0	6	7	-1.20598e-05	1.4544e-10
B2	396	16986.5	0	6	7	0	0
B2	397	17009.4	7	1	3	0	0
A1	398	17009.4	7	1	3	0.000139929	1.95802e-08
A1	399	17059.4	1	2	12	-0.000350512	1.22859e-07
A1	400	17136.7	5	0	9	-0.000110742	1.22637e-08
B2	401	17138.7	5	0	9	0	0
A1	402	17152.1	9	0	2	0.000533158	2.84258e-07
B2	403	17152.1	9	0	2	0	0
A1	404	17161.5	0	0	19	-0.000387584	1.50221e-07
A1	405	17176.8	1	6	5	-0.000167283	2.79835e-08
B2	406	17176.9	1	6	5	0	0
A1	407	17185.2	2	7	1	-3.84599e-05	1.47916e-09
B2	408	17185.5	7	2	1	0	0
B2	409	17232.4	0	3	13	0	0
A1	410	17247.3	0	0	19	-0.000181546	3.29589e-08
A1	411	17293.4	1	5	7	-5.03798e-05	2.53812e-09
B2	412	17304.4	1	5	7	0	0
A1	413	17317.3	6	2	3	-0.000110732	1.22615e-08
B2	414	17320.8	2	6	3	0	0
B2	415	17322.6	2	6	3	0	0
A1	416	17324.2	6	2	3	0.000216784	4.69952e-08
A1	417	17372.6	1	5	7	-6.49841e-05	4.22293e-09
A1	418	17398.5	3	6	1	-4.168e-05	1.73722e-09
B2	419	17405.3	0	8	4	0	0
A1	420	17405.6	0	8	4	-0.000367021	1.34705e-07
A1	421	17406.6	3	6	1	-0.000146673	2.1513e-08
B2	422	17409.6	3	1	11	0	0
B2	423	17430.6	9	1	0	0	0
A1	424	17430.6	9	1	0	0.000219229	4.80615e-08
A1	425	17431.1	1	1	15	0.000113718	1.29318e-08
B2	426	17435.1	6	3	1	0	0
B2	427	17439.1	2	5	5	0	0
B2	428	17444	0	1	17	0	0
A1	429	17484.1	4	3	5	0.00021055	4.43312e-08
A1	430	17486.8	4	4	3	6.99687e-05	4.89562e-09
A1	431	17502.9	4	3	5	8.35538e-05	6.98124e-09
B2	432	17531.4	5	3	3	0	0
B2	433	17547.5	5	3	3	0	0
A1	434	17548.4	4	5	1	-9.54793e-06	9.11629e-11
A1	435	17561.2	4	5	1	-4.87574e-05	2.37729e-09
B2	436	17575.6	2	1	13	0	0
B2	437	17582.3	3	2	9	0	0
A1	438	17583.5	4	3	5	-9.8604e-05	9.72275e-09
A1	439	17617.9	3	3	7	-4.6899e-05	2.19952e-09
A1	440	17634.9	0	7	6	-0.000311236	9.68677e-08
B2	441	17635	0	7	6	0	0
A1	442	17644.6	8	1	2	8.15863e-05	6.65633e-09
B2	443	17644.6	8	1	2	0	0
B2	444	17645.4	3	4	5	0	0
A1	445	17651.1	4	4	3	8.04291e-05	6.46884e-09
B2	446	17670.3	5	4	1	0	0
A1	447	17678.1	2	2	11	0.000176784	3.12527e-08
A1	448	17686.8	3	3	7	-0.000163845	2.68451e-08
B2	449	17696	3	2	9	0	0
A1	450	17707.4	10	0	1	-8.68584e-05	7.54438e-09
B2	451	17707.4	10	0	1	0	0
B2	452	17792.8	3	1	11	0	0
A1	453	17794.5	2	4	9	-7.10914e-05	5.05399e-09
B2	454	17830	0	6	8	0	0
A1	455	17830	0	6	8	0.000251214	6.31083e-08
B2	456	17841.4	7	1	4	0	0
A1	457	17841.4	7	1	4	-5.54425e-05	3.07387e-09
A1	458	17851.4	2	8	0	0.000281997	7.95225e-08
B2	459	17851.5	8	2	0	0	0
A1	460	17937.3	1	3	13	0.000283174	8.01872e-08
A1	461	17966.2	0	0	20	3.82588e-05	1.46373e-09
B2	462	17978.5	5	0	10	0	0
A1	463	17987.4	5	0	10	0.000226523	5.13128e-08
B2	464	17988.6	9	0	3	0	0
A1	465	17988.7	9	0	3	4.25717e-05	1.81235e-09
A1	466	18010.4	1	6	6	-1.50463e-05	2.26391e-10
B2	467	18010.8	1	6	6	0	0
A1	468	18012.4	2	7	2	-0.000136633	1.86687e-08
B2	469	18012.7	7	2	2	0	0
B2	470	18069.4	0	2	16	0	0
A1	471	18083.8	0	0	20	-7.17168e-05	5.1433e-09
A1	472	18123.2	5	2	6	4.14457e-05	1.71775e-09
A1	473	18135.4	3	7	0	3.11692e-05	9.71516e-10
B2	474	18140.2	2	5	6	0	0
A1	475	18146.1	6	2	4	-0.000116845	1.36528e-08
B2	476	18147.6	7	3	0	0	0
B2	477	18152.4	2	6	4	0	0
A1	478	18169.7	0	0	20	0.000246861	6.09405e-08
B2	479	18173	0	1	18	0	0
A1	480	18208.7	1	5	8	9.64349e-05	9.29968e-09
A1	481	18224.4	3	6	2	-5.76243e-05	3.32056e-09
B2	482	18230.3	0	11	0	0	0
A1	483	18230.3	0	11	0	-0.000639457	4.08905e-07
A1	484	18237.1	3	6	2	0.000118549	1.40539e-08
B2	485	18251.1	9	1	1	0	0
A1	486	18251.1	9	1	1	-0.000329142	1.08334e-07
B2	487	18258.8	0	8	5	0	0
A1	488	18259.5	0	8	5	-4.90014e-06	2.40114e-11
B2	489	18260.1	0	8	5	0	0
B2	490	18265.1	6	3	2	0	0
B2	491	18279.4	2	5	6	0	0
A1	492	18283.5	5	5	0	7.58187e-05	5.74848e-09
A1	493	18292.2	1	1	16	6.72537e-05	4.52306e-09
B2	494	18303	0	1	18	0	0
A1	495	18322.6	4	4	4	-2.96338e-05	8.7816e-10
A1	496	18330.7	5	2	6	-3.79086e-05	1.43706e-09
A1	497	18356.1	4	3	6	0.000100206	1.00413e-08
B2	498	18375.3	5	3	4	0	0
A1	499	18382.2	4	5	2	-3.34511e-05	1.11898e-09
B2	500	18386.7	4	6	0	0	0
B2	501	18398.8	5	3	4	0	0
A1	502	18416.3	4	3	6	-8.21135e-05	6.74263e-09
B2	503	18445.6	2	1	14	0	0
A1	504	18447.1	2	2	12	0.000380628	1.44878e-07
B2	505	18447.2	3	2	10	0	0
A1	506	18474.5	8	1	3	6.98046e-05	4.87268e-09
B2	507	18474.7	8	1	3	0	0
A1	508	18478.8	3	3	8	-7.77829e-05	6.05019e-09
A1	509	18494.9	4	4	4	7.88248e-05	6.21335e-09
B2	510	18497.6	3	4	6	0	0
B2	511	18508.6	5	4	2	0	0
A1	512	18517.9	0	7	7	5.59203e-05	3.12708e-09
B2	513	18517.9	0	7	7	0	0
A1	514	18530.5	5	5	0	3.58848e-05	1.28772e-09
A1	515	18546.1	3	3	8	0.000118053	1.39364e-08
A1	516	18556.6	2	2	12	-0.000224786	5.05286e-08
A1	517	18559.2	10	0	2	-0.000377128	1.42225e-07
B2	518	18559.2	10	0	2	0	0
B2	519	18566.4	3	2	10	0	0
A1	520	18667.5	2	4	10	-0.00016697	2.7879e-08
A1	521	18669.2	2	8	1	1.34091e-05	1.79803e-10
B2	522	18669.3	8	2	1	0	0
B2	523	18678.8	2	1	14	0	0
B2	524	18691	7	1	5	0	0
A1	525	18691	7	1	5	-9.65044e-05	9.31309e-09
B2	526	18758.7	0	6	9	0	0
A1	527	18758.8	0	6	9	-3.69981e-05	1.36886e-09
A1	528	18825.3	10	1	0	0.00015476	2.39507e-08
B2	529	18825.3	10	1	0	0	0
A1	530	18825.7	1	3	14	-0.000203298	4.13302e-08
A1	531	18839.1	2	7	3	3.44497e-06	1.18678e-11
B2	532	18839.7	7	2	3	0	0
A1	533	18860.8	9	0	4	0.000257125	6.61133e-08
B2	534	18860.9	9	0	4	0	0
A1	535	18890.9	1	6	7	0.000100778	1.01563e-08
B2	536	18892.2	1	6	7	0	0
A1	537	18951.6	3	7	1	-5.87522e-05	3.45183e-09
A1	538	18962.6	5	0	11	3.44875e-06	1.18939e-11
B2	539	18963.4	5	0	11	0	0
B2	540	18965.7	7	3	1	0	0
A1	541	18987.2	3	6	3	-0.000166039	2.7569e-08
A1	542	18987.7	0	0	21	0.000209743	4.39922e-08
B2	543	19002.4	2	6	5	0	0
A1	544	19052.1	4	4	5	1.61186e-05	2.59809e-10
A1	545	19055.8	3	6	3	7.4139e-05	5.49659e-09
B2	546	19056.2	2	5	7	0	0
B2	547	19067.1	0	1	19	0	0
B2	548	19073.9	9	1	2	0	0
A1	549	19074.1	9	1	2	-8.05741e-05	6.49219e-09
A1	550	19092	0	3	15	2.08628e-05	4.35255e-10
B2	551	19096.7	6	3	3	0	0
A1	552	19098.3	0	11	1	1.95113e-05	3.80692e-10
B2	553	19098.6	0	11	1	0	0
A1	554	19101.9	5	5	1	-2.89906e-05	8.40453e-10
A1	555	19112.6	5	5	1	5.96617e-06	3.55952e-11
B2	556	19132.8	0	4	13	0	0
B2	557	19142.4	0	8	6	0	0
A1	558	19143.6	0	8	6	-0.000215804	4.65714e-08
A1	559	19152.4	4	5	3	7.93747e-05	6.30034e-09
B2	560	19163.1	5	3	5	0	0
B2	561	19182.2	4	2	9	0	0
A1	562	19196.2	4	5	3	9.22372e-06	8.50771e-11
A1	563	19203.9	2	0	17	-6.52958e-05	4.26354e-09
B2	564	19208.2	4	6	1	0	0
A1	565	19223.4	4	3	7	9.66191e-05	9.33525e-09
A1	566	19231	4	5	3	4.58062e-05	2.09821e-09
B2	567	19237.8	5	3	5	0	0
B2	568	19264.2	2	5	7	0	0
A1	569	19273.2	1	3	13	7.15843e-05	5.12431e-09
A1	570	19298.7	9	2	0	-0.000188538	3.55465e-08
B2	571	19298.8	9	2	0	0	0
A1	572	19305.4	4	4	5	-0.000153606	2.35948e-08
B2	573	19314.1	2	1	15	0	0
A1	574	19326.3	8	1	4	-5.40274e-05	2.91896e-09
B2	575	19326.9	8	1	4	0	0
A1	576	19332	3	3	9	5.29899e-05	2.80793e-09
B2	577	19335.2	5	4	3	0	0
A1	578	19350.8	5	5	1	-3.5016e-05	1.22612e-09
B2	579	19353.3	3	4	7	0	0
A1	580	19356.7	5	5	1	-3.75643e-05	1.41108e-09
B2	581	19385.9	3	2	11	0	0
A1	582	19409	3	3	9	0.000107572	1.15718e-08
B2	583	19419.2	0	7	8	0	0
A1	584	19422.7	0	7	8	-0.00012173	1.48181e-08
B2	585	19429.8	4	2	9	0	0
A1	586	19441.5	1	0	19	-8.08759e-05	6.5409e-09
B2	587	19489.8	8	2	2	0	0
A1	588	19489.8	2	8	2	9.88088e-05	9.76317e-09
A1	589	19526.5	2	2	13	0.000157685	2.48647e-08
B2	590	19546.5	0	12	0	0	0
A1	591	19546.5	0	12	0	-0.000392703	1.54216e-07
B2	592	19552.3	0	12	0	0	0
A1	593	19552.3	0	12	0	-0.000317518	1.00818e-07
B2	594	19553.4	0	2	17	0	0
A1	595	19562.7	7	1	6	-6.64966e-05	4.4218e-09
B2	596	19564	7	1	6	0	0
A1	597	19581.5	1	0	19	0.000145827	2.12654e-08
A1	598	19645.1	3	8	0	-5.92892e-06	3.51521e-11
B2	599	19647.8	8	3	0	0	0
A1	600	19675.2	10	1	1	-0.000156743	2.45682e-08
B2	601	19675.6	10	1	1	0	0
A1	602	19677.8	10	1	1	6.18338e-05	3.82342e-09
B2	603	19678.2	7	2	4	0	0
A1	604	19679.1	0	6	10	0.000145956	2.13032e-08
B2	605	19680.7	0	6	10	0	0
B2	606	19708.4	3	1	13	0	0
A1	607	19749.2	2	4	11	-5.01204e-05	2.51206e-09
A1	608	19762.8	3	7	2	-9.45704e-06	8.94357e-11
B2	609	19779.3	2	6	6	0	0
B2	610	19782.2	7	3	2	0	0
A1	611	19784	6	2	6	-3.13773e-05	9.84537e-10
A1	612	19829.5	5	6	0	6.52022e-05	4.25133e-09
A1	613	19832.4	3	6	4	-5.38034e-06	2.8948e-11
B2	614	19865.5	6	3	4	0	0
A1	615	19876.7	0	0	22	-6.29048e-06	3.95701e-11
B2	616	19892.2	0	4	12	0	0
A1	617	19895	0	4	12	9.14333e-05	8.36004e-09
A1	618	19899.3	5	5	2	-2.26981e-05	5.15205e-10
B2	619	19903.5	7	4	0	0	0
A1	620	19930.5	5	5	2	2.87111e-05	8.24325e-10
B2	621	19939.1	6	3	4	0	0
A1	622	19941.3	1	3	15	-0.00022341	4.99121e-08
A1	623	19948.4	4	4	6	-2.55511e-05	6.52858e-10
B2	624	19966.3	2	5	8	0	0
B2	625	19967.4	0	1	20	0	0
B2	626	19975.4	0	11	2	0	0
A1	627	19975.5	0	11	2	-0.000215617	4.64907e-08

## Sheet: LML
Gamma	NN	E-ZPE, cm-1	v1	v2	v3	Density	Density
A1	1	0	0	0	0	0.153669	0.392007
A1	2	998.608	0	0	1	0.378263	-0.615031
A1	3	1978.35	0	0	2	0.211592	-0.459991
B2	4	1993	0	1	0	0	0
A1	5	2005.54	1	0	0	0.106086	0.325708
A1	6	2951.68	0	0	3	0.0745827	0.273098
B2	7	2974.73	0	1	1	0	0
A1	8	2998.78	1	0	1	0.0195051	-0.139661
A1	9	3907.79	2	0	0	0.0100633	-0.100316
B2	10	3913.39	0	2	0	0	0
A1	11	3923.64	2	0	0	0.000108762	0.0104289
B2	12	3952.47	0	1	2	0	0
A1	13	3975.99	1	1	0	0.000312653	-0.017682
A1	14	3996.33	1	1	0	0.000647527	-0.0254465
A1	15	4861.11	1	0	3	0.00204066	-0.0451737
B2	16	4873.17	0	2	1	0	0
A1	17	4889.76	2	0	1	0.0114571	-0.107038
B2	18	4924.73	0	1	3	0	0
A1	19	4941.7	1	1	1	0.00330737	-0.0575097
A1	20	4978.54	1	0	3	0.00283683	0.0532619
A1	21	5768.07	0	3	0	0.00148677	0.0385587
B2	22	5768.23	0	3	0	0	0
A1	23	5805.81	1	0	4	0.000201437	0.0141928
B2	24	5825.27	0	2	2	0	0
A1	25	5848.65	2	0	2	0.0110686	0.105208
A1	26	5888.69	1	1	2	0.000250107	0.0158148
B2	27	5889.45	0	1	4	0	0
B2	28	5911.15	2	1	0	0	0
A1	29	5912.98	1	2	0	0.000844603	0.029062
A1	30	5956.65	1	0	4	0.000234221	0.0153043
A1	31	6710.83	0	3	1	0.00255423	-0.0505394
B2	32	6711.68	0	3	1	0	0
A1	33	6742.71	1	0	5	2.59861e-05	-0.00509766
B2	34	6770.28	0	2	3	0	0
A1	35	6799.86	2	0	3	0.00190453	0.043641
A1	36	6830.3	1	1	3	2.15431e-05	-0.00464146
B2	37	6843.9	0	1	5	0	0
B2	38	6865.35	2	1	1	0	0
A1	39	6871.13	1	2	1	6.89531e-05	-0.0083038
A1	40	6927.95	1	0	5	0.000209414	-0.0144712
A1	41	7554.39	0	4	0	0.000329876	-0.0181625
B2	42	7554.39	0	4	0	0	0
A1	43	7642.6	0	3	2	0.00120027	0.0346449
B2	44	7645.71	0	3	2	0	0
A1	45	7672.75	1	0	6	0.000230124	0.0151698
B2	46	7708.28	0	2	4	0	0
A1	47	7740.73	2	0	4	5.91895e-05	0.00769347
A1	48	7749.7	1	3	0	2.03805e-05	0.00451447
B2	49	7754.76	3	1	0	0	0
A1	50	7770.5	1	1	4	3.59952e-06	-0.00189724
B2	51	7788.84	0	1	6	0	0
A1	52	7813.91	2	2	0	0.00045635	0.0213624
B2	53	7817.65	2	1	2	0	0
A1	54	7834.51	2	2	0	0.000147658	-0.0121514
A1	55	7892.36	1	0	6	0.000176149	0.0132721
A1	56	8481.19	0	4	1	0.000734026	-0.0270929
B2	57	8481.2	0	4	1	0	0
A1	58	8562.82	0	3	3	7.70049e-05	-0.00877525
B2	59	8570.64	0	3	3	0	0
A1	60	8596.63	0	3	3	8.97037e-05	-0.0094712
B2	61	8639.02	0	2	5	0	0
A1	62	8664.62	1	2	3	6.16941e-05	0.00785456
A1	63	8681.32	2	0	5	0.000432089	-0.0207867
B2	64	8682.62	3	1	1	0	0
A1	65	8706.39	1	1	5	3.73485e-05	0.00611134
B2	66	8725.99	0	1	7	0	0
A1	67	8745.08	2	2	1	0.000218164	-0.0147704
B2	68	8764.63	2	1	3	0	0
A1	69	8780.1	2	2	1	1.95039e-05	-0.00441632
A1	70	8849.34	1	0	7	2.06265e-08	0.000143619
A1	71	9272.79	5	0	0	8.63869e-05	-0.00929446
B2	72	9272.79	5	0	0	0	0
A1	73	9398.89	0	4	2	0.000533685	0.0231016
B2	74	9398.94	0	4	2	0	0
A1	75	9471.66	0	3	4	3.55023e-05	0.00595838
B2	76	9486.61	0	3	4	0	0
A1	77	9513.96	0	3	4	5.42124e-06	0.00232836
A1	78	9534.71	1	4	0	1.13541e-06	-0.00106556
B2	79	9535.43	4	1	0	0	0
B2	80	9562.04	0	2	6	0	0
A1	81	9576.55	1	2	4	2.71954e-06	0.0016491
B2	82	9603.05	3	1	2	0	0
A1	83	9606.01	2	0	6	0.000132105	0.0114937
A1	84	9635.37	1	1	6	1.92243e-05	-0.00438455
A1	85	9652.17	2	3	0	2.59748e-05	-0.00509655
B2	86	9654.85	0	1	8	0	0
A1	87	9673.52	2	2	2	3.05234e-06	0.00174709
B2	88	9686.16	3	2	0	0	0
B2	89	9705.21	2	1	4	0	0
A1	90	9720.36	2	2	2	5.00961e-05	0.00707786
A1	91	9798.51	1	0	8	2.78654e-05	-0.00527877
A1	92	10181.6	5	0	1	0.000224464	-0.0149821
B2	93	10181.6	5	0	1	0	0
A1	94	10307.5	0	4	3	0.000110532	-0.0105134
B2	95	10307.7	0	4	3	0	0
A1	96	10369.8	1	0	9	4.69527e-05	0.0068522
B2	97	10393.7	0	3	5	0	0
A1	98	10423.6	0	3	5	4.36911e-05	-0.00660993
A1	99	10444	1	4	1	1.0751e-05	-0.00327886
B2	100	10445.7	4	1	1	0	0
B2	101	10476.7	0	1	9	0	0
A1	102	10480.2	1	2	5	2.38182e-05	-0.00488039
B2	103	10516.7	3	1	3	0	0
A1	104	10520.9	1	3	3	2.45429e-08	0.000156662
A1	105	10553.5	2	3	1	9.70802e-06	-0.00311577
A1	106	10567.6	2	2	3	4.09582e-06	-0.00202381
B2	107	10574.2	0	1	9	0	0
A1	108	10594	2	3	1	3.06487e-05	-0.00553613
B2	109	10603	3	2	1	0	0
B2	110	10638.2	2	1	5	0	0
A1	111	10652.9	2	2	3	5.23628e-05	0.00723621
A1	112	10739.5	1	1	7	4.42143e-06	-0.00210272
A1	113	10924.6	0	6	0	2.54394e-05	-0.00504375
B2	114	10924.6	0	6	0	0	0
A1	115	11081.7	5	0	2	0.000201417	0.0141921
B2	116	11081.7	5	0	2	0	0
A1	117	11206.5	0	4	4	3.44999e-07	0.000587366
B2	118	11207.2	0	4	4	0	0
A1	119	11248.1	1	5	0	1.5572e-07	-0.000394614
B2	120	11248.2	1	5	0	0	0
A1	121	11257.8	1	0	10	2.85584e-06	-0.00168992
B2	122	11291.8	0	3	6	0	0
A1	123	11323.9	0	3	6	8.60851e-06	-0.00293403
A1	124	11342.5	1	4	2	1.4634e-05	0.00382544
B2	125	11346.7	4	1	2	0	0
A1	126	11377.1	1	2	6	4.72319e-06	0.00217329
B2	127	11382.2	0	1	10	0	0
A1	128	11422.6	2	4	0	1.62377e-06	-0.00127427
B2	129	11423.7	3	1	4	0	0
A1	130	11431	2	4	0	2.2022e-05	-0.00469276
B2	131	11446.9	4	2	0	0	0
A1	132	11461.7	2	3	2	2.01686e-05	0.00449095
A1	133	11482.8	2	2	4	1.79841e-06	-0.00134105
B2	134	11483.4	0	1	10	0	0
A1	135	11504.2	2	3	2	1.79203e-05	0.00423324
B2	136	11515.7	3	2	2	0	0
A1	137	11527.6	3	3	0	2.7632e-06	0.00166229
B2	138	11563.2	2	1	6	0	0
A1	139	11577.3	2	2	4	3.4738e-07	-0.00058939
A1	140	11671.8	1	1	8	2.19183e-06	-0.00148048
A1	141	11814.5	0	6	1	7.46399e-05	-0.00863944
B2	142	11814.5	0	6	1	0	0
B2	143	11973.3	5	0	3	0	0
A1	144	11973.3	5	0	3	6.2779e-05	-0.00792332
A1	145	12095	0	4	5	1.72954e-05	-0.00415877
B2	146	12097.3	0	4	5	0	0
A1	147	12136.2	1	0	11	5.95167e-06	0.0024396
A1	148	12140.6	1	5	1	1.33679e-06	-0.0011562
B2	149	12140.6	1	5	1	0	0
B2	150	12180.8	0	2	9	0	0
A1	151	12212.8	0	3	7	1.39087e-06	-0.00117935
A1	152	12231.3	1	4	3	1.57787e-06	-0.00125613
B2	153	12238.6	4	1	3	0	0
A1	154	12267.7	1	4	3	1.94387e-06	-0.00139423
B2	155	12278.1	0	1	11	0	0
A1	156	12311.1	2	4	1	1.8159e-06	0.00134755
B2	157	12323.6	3	1	5	0	0
A1	158	12326.4	2	4	1	1.56486e-05	0.00395583
B2	159	12341.9	4	2	1	0	0
A1	160	12362.3	1	1	9	2.45403e-06	-0.00156653
B2	161	12383.1	0	1	11	0	0
A1	162	12391.9	2	2	5	6.5266e-07	0.000807874
A1	163	12402.5	3	3	1	4.14307e-08	0.000203545
B2	164	12422.5	3	2	3	0	0
A1	165	12429.6	3	3	1	7.2601e-08	-0.000269446
B2	166	12479.8	2	1	7	0	0
A1	167	12493	2	2	5	1.04439e-05	0.00323171
A1	168	12510.8	0	7	0	7.91983e-06	0.00281422
B2	169	12510.8	0	7	0	0	0
A1	170	12595	1	1	9	2.21137e-06	-0.00148707
A1	171	12696.2	0	6	2	7.85131e-05	-0.00886076
B2	172	12696.2	0	6	2	0	0
B2	173	12856.2	5	0	4	0	0
A1	174	12856.2	5	0	4	1.19828e-06	0.00109466
A1	175	12893.1	1	6	0	6.17598e-08	0.000248515
B2	176	12893.2	1	6	0	0	0
A1	177	12970.9	0	4	6	4.0995e-06	-0.00202472
B2	178	12977.4	0	4	6	0	0
A1	179	13006.4	0	4	6	6.83605e-06	-0.00261458
A1	180	13023.7	1	5	2	2.57446e-06	-0.00160451
B2	181	13023.9	1	5	2	0	0
B2	182	13060.5	0	2	10	0	0
A1	183	13088.4	1	3	6	2.20364e-06	0.00148447
A1	184	13111.8	1	4	4	1.00356e-06	0.00100178
B2	185	13121.7	4	1	4	0	0
A1	186	13141	5	2	0	3.11337e-06	-0.00176447
B2	187	13146.8	2	5	0	0	0
A1	188	13151.2	1	4	4	4.57609e-06	0.00213918
B2	189	13163.9	0	1	12	0	0
A1	190	13190.3	2	3	4	2.7955e-06	0.00167197
A1	191	13211.3	2	4	2	1.74942e-06	-0.00132266
B2	192	13215.2	2	1	8	0	0
B2	193	13230.6	4	2	2	0	0
A1	194	13250.5	4	3	0	7.26727e-07	0.000852483
A1	195	13259.8	4	3	0	1.01487e-06	-0.00100741
B2	196	13273.2	0	1	12	0	0
A1	197	13290.1	3	3	2	2.4484e-06	0.00156474
A1	198	13293.9	1	3	6	3.87989e-08	0.000196974
B2	199	13320	3	2	4	0	0
B2	200	13326.2	3	4	0	0	0
A1	201	13326.4	3	3	2	2.90523e-06	0.00170447
A1	202	13381.4	0	7	1	2.57157e-05	0.00507107
B2	203	13381.4	0	7	1	0	0
B2	204	13387.5	2	1	8	0	0
A1	205	13399.4	2	2	6	3.70963e-06	0.00192604
A1	206	13508.7	1	1	10	1.86777e-08	0.000136666
A1	207	13569.7	0	6	3	3.22348e-05	0.00567757
B2	208	13569.7	0	6	3	0	0
A1	209	13730.2	5	0	5	5.46403e-06	-0.00233753
B2	210	13730.2	5	0	5	0	0
A1	211	13766.6	1	6	1	4.69981e-07	-0.000685552
B2	212	13766.6	1	6	1	0	0
A1	213	13831.5	0	4	7	5.33805e-08	0.000231042
B2	214	13847.1	0	4	7	0	0
A1	215	13869.8	0	4	7	4.23225e-08	0.000205724
A1	216	13897.6	1	5	3	1.35576e-06	-0.00116437
B2	217	13898.2	1	5	3	0	0
B2	218	13930.4	0	2	11	0	0
A1	219	13951.5	1	3	7	6.56245e-08	0.000256173
A1	220	13983.1	0	3	9	6.1055e-07	-0.000781377
B2	221	13995.8	4	1	5	0	0
A1	222	14013.5	5	2	1	5.7475e-06	-0.00239739
B2	223	14021.8	2	5	1	0	0
A1	224	14026.3	1	4	5	1.0183e-07	-0.000319109
A1	225	14032.3	0	8	0	2.35545e-06	0.00153475
B2	226	14032.3	0	8	0	0	0
B2	227	14039.1	0	1	13	0	0
A1	228	14062.9	2	3	5	3.96043e-07	0.000629319
A1	229	14085.2	2	4	3	2.14483e-08	-0.000146452
B2	230	14097.1	4	2	3	0	0
B2	231	14113.8	4	2	3	0	0
A1	232	14128	4	3	1	2.47665e-06	-0.00157374
A1	233	14144.6	4	3	1	1.24755e-06	-0.00111694
B2	234	14153.3	0	1	13	0	0
A1	235	14169.3	3	3	3	1.44994e-06	-0.00120413
A1	236	14186.7	2	2	7	5.57048e-08	-0.000236019
B2	237	14200.8	3	4	1	0	0
A1	238	14215.2	3	3	3	5.15617e-07	-0.000718065
B2	239	14215.2	3	2	5	0	0
A1	240	14244.3	0	7	2	3.13144e-05	0.00559593
B2	241	14244.3	0	7	2	0	0
B2	242	14285.9	2	1	9	0	0
A1	243	14296.2	2	2	7	4.11927e-07	0.000641815
A1	244	14412.3	1	2	9	5.9552e-07	-0.0007717
B2	245	14435	0	6	4	0	0
A1	246	14435	0	6	4	2.41032e-06	-0.00155252
A1	247	14471.1	7	1	0	3.02784e-08	-0.000174007
B2	248	14471.2	7	1	0	0	0
A1	249	14594.9	5	0	6	4.49809e-06	0.00212087
B2	250	14594.9	5	0	6	0	0
B2	251	14631.2	1	6	2	0	0
A1	252	14631.2	1	6	2	8.67975e-07	-0.000931652
A1	253	14676.1	1	0	14	2.5328e-07	0.000503269
B2	254	14706	0	4	8	0	0
A1	255	14725.9	0	4	8	1.60619e-06	0.00126736
A1	256	14761.8	1	5	4	7.29489e-08	-0.000270091
B2	257	14763.3	1	5	4	0	0
A1	258	14780.7	6	2	0	5.33304e-07	0.000730276
B2	259	14781.9	2	6	0	0	0
B2	260	14790.2	0	2	12	0	0
A1	261	14803.7	0	0	16	2.1405e-07	-0.000462655
A1	262	14843.8	0	3	10	1.66166e-08	-0.000128905
B2	263	14861.1	4	1	6	0	0
A1	264	14874.3	5	2	2	2.42371e-06	0.00155683
B2	265	14883.6	0	8	1	0	0
A1	266	14883.6	0	8	1	8.7101e-06	0.00295129
B2	267	14888	2	5	2	0	0
A1	268	14891.3	5	2	2	1.65796e-06	0.00128762
B2	269	14903.6	0	1	14	0	0
A1	270	14929.2	1	4	6	1.27729e-09	3.57393e-05
A1	271	14938.8	4	4	0	3.29612e-10	-1.81552e-05
A1	272	14948.6	2	4	4	2.1699e-07	-0.000465822
B2	273	14969.1	4	2	4	0	0
B2	274	14988.5	5	3	0	0	0
B2	275	14991.6	5	3	0	0	0
A1	276	14997.9	4	3	2	9.67232e-07	0.00098348
A1	277	15020.4	4	3	2	1.24558e-08	0.000111605
B2	278	15022.8	0	1	14	0	0
A1	279	15039.5	3	3	4	2.10954e-12	-1.45243e-06
A1	280	15071	2	2	8	3.03512e-08	-0.000174216
B2	281	15072.7	3	4	2	0	0
A1	282	15091.4	4	4	0	1.87187e-07	-0.000432652
A1	283	15096.9	4	4	0	2.53692e-07	-0.000503679
B2	284	15097.6	3	2	6	0	0
A1	285	15099.6	0	7	3	1.61157e-05	0.00401444
B2	286	15099.7	0	7	3	0	0
B2	287	15174.7	2	1	10	0	0
A1	288	15182.7	2	3	6	1.39868e-06	-0.00118266
A1	289	15292	0	6	5	1.01323e-06	0.00100659
B2	290	15292	0	6	5	0	0
A1	291	15305.4	1	2	10	6.87025e-08	-0.000262112
A1	292	15324.9	7	1	1	1.93687e-07	-0.000440099
B2	293	15324.9	7	1	1	0	0
A1	294	15449.8	5	0	7	2.34475e-07	-0.000484226
B2	295	15450.1	5	0	7	0	0
B2	296	15487.1	1	6	3	0	0
A1	297	15487.1	1	6	3	2.16253e-07	0.00046503
B2	298	15490.3	9	0	0	0	0
A1	299	15490.3	9	0	0	1.05907e-06	-0.00102911
A1	300	15506.6	1	0	15	1.68632e-08	-0.000129858
B2	301	15553.7	0	3	11	0	0
A1	302	15572.4	0	4	9	6.6405e-07	0.000814893
A1	303	15615.4	1	5	5	8.19415e-08	-0.000286254
B2	304	15618.9	1	5	5	0	0
A1	305	15635.8	6	2	1	1.53528e-06	0.00123906
B2	306	15637.3	2	6	1	0	0
B2	307	15639.6	0	2	13	0	0
A1	308	15646.5	0	0	17	1.0499e-07	-0.000324021
A1	309	15693.2	2	4	5	1.95886e-07	-0.00044259
B2	310	15717.2	3	1	9	0	0
A1	311	15724.8	5	2	3	7.18799e-07	-0.00084782
B2	312	15728.2	0	8	2	0	0
A1	313	15728.3	0	8	2	1.20514e-05	-0.00347152
A1	314	15745.2	5	2	3	1.56784e-06	0.00125213
B2	315	15745.6	2	5	3	0	0
B2	316	15757.1	0	1	15	0	0
A1	317	15787.8	1	4	7	2.37031e-08	-0.000153958
A1	318	15796.3	4	4	1	7.62835e-08	0.000276195
A1	319	15802.7	4	3	3	1.36798e-07	-0.000369862
B2	320	15831.2	4	2	5	0	0
B2	321	15847.8	5	3	1	0	0
A1	322	15858.9	4	3	3	2.02572e-08	0.000142328
B2	323	15860.9	4	1	7	0	0
B2	324	15881.4	0	1	15	0	0
A1	325	15884.4	4	3	3	4.27939e-08	-0.000206867
A1	326	15902.7	3	3	5	5.02275e-07	-0.000708713
B2	327	15937.3	3	4	3	0	0
A1	328	15945.7	2	2	9	6.79395e-07	0.000824254
B2	329	15947.8	0	7	4	0	0
A1	330	15948.3	0	7	4	1.7676e-06	-0.00132951
A1	331	15951.6	4	4	1	1.63745e-07	-0.000404655
A1	332	15966.5	3	3	5	3.69045e-07	0.000607491
B2	333	15970.9	3	2	7	0	0
A1	334	15983.1	8	1	0	1.60886e-08	0.000126841
B2	335	15983.1	8	1	0	0	0
B2	336	16053.4	2	1	11	0	0
A1	337	16058.7	2	3	7	2.97422e-08	0.000172459
A1	338	16141.1	0	6	6	2.0297e-06	0.00142467
B2	339	16141.1	0	6	6	0	0
A1	340	16170.4	7	1	2	3.55218e-07	-0.000596002
B2	341	16170.4	7	1	2	0	0
A1	342	16187.7	1	2	11	7.21807e-08	-0.000268665
A1	343	16294.6	5	0	8	2.96773e-07	-0.000544768
B2	344	16296	5	0	8	0	0
A1	345	16323.1	9	0	1	2.89843e-06	0.00170248
B2	346	16323.1	9	0	1	0	0
A1	347	16324.4	0	0	18	3.82109e-08	-0.000195476
A1	348	16335.4	1	6	4	2.44191e-07	-0.000494156
B2	349	16335.4	1	6	4	0	0
A1	350	16349.6	2	7	0	1.5623e-07	-0.00039526
B2	351	16349.9	7	2	0	0	0
B2	352	16390.9	0	3	12	0	0
A1	353	16408.2	0	0	18	1.37128e-08	0.000117101
A1	354	16457.8	1	5	6	3.51776e-08	0.000187557
B2	355	16464.6	1	5	6	0	0
B2	356	16480.4	0	4	10	0	0
A1	357	16480.5	6	2	2	8.88079e-07	0.000942379
A1	358	16482.9	6	2	2	5.55512e-07	-0.000745327
B2	359	16483.7	2	6	2	0	0
A1	360	16532.9	2	4	6	9.92145e-08	-0.000314983
B2	361	16564.6	3	1	10	0	0
A1	362	16564.9	3	6	0	1.68146e-07	-0.000410057
A1	363	16568.9	0	8	3	6.28166e-06	-0.00250632
B2	364	16569.1	0	8	3	0	0
A1	365	16569.8	3	6	0	1.56025e-06	-0.0012491
A1	366	16589.2	1	1	14	7.02213e-08	0.000264993
B2	367	16595.1	2	5	4	0	0
B2	368	16597.9	6	3	0	0	0
B2	369	16601.7	0	1	16	0	0
A1	370	16636.9	1	4	8	2.00088e-08	0.000141452
A1	371	16644.4	4	4	2	2.33072e-07	-0.000482775
A1	372	16653	4	3	4	7.06217e-11	8.40367e-06
B2	373	16684	4	2	6	0	0
B2	374	16700.1	5	3	2	0	0
A1	375	16708	4	5	0	1.66238e-07	0.000407723
A1	376	16713.2	4	5	0	2.0398e-07	-0.000451641
B2	377	16723	4	1	8	0	0
B2	378	16730.6	3	2	8	0	0
A1	379	16735.6	4	3	4	4.36413e-09	6.60616e-05
A1	380	16761.1	3	3	6	1.45734e-07	-0.000381751
A1	381	16793	0	7	5	9.58342e-08	-0.000309571
B2	382	16793	0	7	5	0	0
B2	383	16794.5	3	4	4	0	0
A1	384	16804	4	4	2	1.57497e-08	-0.000125498
A1	385	16813.1	2	2	10	1.61138e-09	4.0142e-05
A1	386	16817.2	8	1	1	9.68693e-08	0.000311238
B2	387	16817.2	8	1	1	0	0
A1	388	16827.7	3	3	6	5.23977e-09	-7.23863e-05
B2	389	16828.3	5	4	0	0	0
B2	390	16835.5	3	2	8	0	0
A1	391	16885.8	10	0	0	1.90936e-07	0.000436962
B2	392	16885.8	10	0	0	0	0
B2	393	16922.9	2	1	12	0	0
A1	394	16925.1	2	3	8	2.59502e-07	0.000509413
A1	395	16986.4	0	6	7	3.58126e-07	0.000598437
B2	396	16986.5	0	6	7	0	0
B2	397	17009.4	7	1	3	0	0
A1	398	17009.4	7	1	3	2.53953e-07	0.000503938
A1	399	17059.4	1	2	12	4.78534e-08	0.000218754
A1	400	17136.7	5	0	9	2.90503e-07	-0.000538983
B2	401	17138.7	5	0	9	0	0
A1	402	17152.1	9	0	2	5.02926e-06	-0.0022426
B2	403	17152.1	9	0	2	0	0
A1	404	17161.5	0	0	19	2.76495e-08	0.000166281
A1	405	17176.8	1	6	5	1.6301e-08	0.000127676
B2	406	17176.9	1	6	5	0	0
A1	407	17185.2	2	7	1	5.24935e-07	0.000724524
B2	408	17185.5	7	2	1	0	0
B2	409	17232.4	0	3	13	0	0
A1	410	17247.3	0	0	19	1.74881e-07	-0.000418188
A1	411	17293.4	1	5	7	1.10422e-08	-0.000105082
B2	412	17304.4	1	5	7	0	0
A1	413	17317.3	6	2	3	2.9536e-07	-0.000543471
B2	414	17320.8	2	6	3	0	0
B2	415	17322.6	2	6	3	0	0
A1	416	17324.2	6	2	3	2.28257e-07	-0.000477762
A1	417	17372.6	1	5	7	9.14345e-09	-9.56214e-05
A1	418	17398.5	3	6	1	5.83261e-08	0.000241508
B2	419	17405.3	0	8	4	0	0
A1	420	17405.6	0	8	4	9.97649e-07	-0.000998824
A1	421	17406.6	3	6	1	8.59335e-07	-0.000927003
B2	422	17409.6	3	1	11	0	0
B2	423	17430.6	9	1	0	0	0
A1	424	17430.6	9	1	0	7.80341e-10	-2.79346e-05
A1	425	17431.1	1	1	15	1.9683e-07	0.000443655
B2	426	17435.1	6	3	1	0	0
B2	427	17439.1	2	5	5	0	0
B2	428	17444	0	1	17	0	0
A1	429	17484.1	4	3	5	6.34342e-09	-7.96456e-05
A1	430	17486.8	4	4	3	1.33182e-07	0.000364941
A1	431	17502.9	4	3	5	4.58167e-09	6.76881e-05
B2	432	17531.4	5	3	3	0	0
B2	433	17547.5	5	3	3	0	0
A1	434	17548.4	4	5	1	4.20128e-08	0.00020497
A1	435	17561.2	4	5	1	5.2124e-08	-0.000228307
B2	436	17575.6	2	1	13	0	0
B2	437	17582.3	3	2	9	0	0
A1	438	17583.5	4	3	5	9.21529e-11	-9.59963e-06
A1	439	17617.9	3	3	7	1.26628e-08	-0.000112529
A1	440	17634.9	0	7	6	8.73813e-07	-0.00093478
B2	441	17635	0	7	6	0	0
A1	442	17644.6	8	1	2	1.49312e-07	0.000386408
B2	443	17644.6	8	1	2	0	0
B2	444	17645.4	3	4	5	0	0
A1	445	17651.1	4	4	3	2.92735e-09	5.4105e-05
B2	446	17670.3	5	4	1	0	0
A1	447	17678.1	2	2	11	4.59407e-09	-6.77796e-05
A1	448	17686.8	3	3	7	1.37032e-07	-0.000370178
B2	449	17696	3	2	9	0	0
A1	450	17707.4	10	0	1	1.00268e-06	-0.00100134
B2	451	17707.4	10	0	1	0	0
B2	452	17792.8	3	1	11	0	0
A1	453	17794.5	2	4	9	9.51472e-08	-0.000308459
B2	454	17830	0	6	8	0	0
A1	455	17830	0	6	8	4.95185e-08	0.000222528
B2	456	17841.4	7	1	4	0	0
A1	457	17841.4	7	1	4	6.40642e-08	0.000253109
A1	458	17851.4	2	8	0	4.75028e-08	0.000217951
B2	459	17851.5	8	2	0	0	0
A1	460	17937.3	1	3	13	4.75545e-09	-6.89598e-05
A1	461	17966.2	0	0	20	2.2158e-09	-4.70723e-05
B2	462	17978.5	5	0	10	0	0
A1	463	17987.4	5	0	10	3.94526e-07	-0.000628113
B2	464	17988.6	9	0	3	0	0
A1	465	17988.7	9	0	3	3.56647e-06	0.00188851
A1	466	18010.4	1	6	6	5.30692e-08	-0.000230368
B2	467	18010.8	1	6	6	0	0
A1	468	18012.4	2	7	2	5.80254e-07	0.000761744
B2	469	18012.7	7	2	2	0	0
B2	470	18069.4	0	2	16	0	0
A1	471	18083.8	0	0	20	1.22907e-08	0.000110863
A1	472	18123.2	5	2	6	2.08937e-08	-0.000144546
A1	473	18135.4	3	7	0	2.17901e-08	0.000147615
B2	474	18140.2	2	5	6	0	0
A1	475	18146.1	6	2	4	5.13007e-09	-7.16245e-05
B2	476	18147.6	7	3	0	0	0
B2	477	18152.4	2	6	4	0	0
A1	478	18169.7	0	0	20	2.14994e-08	-0.000146627
B2	479	18173	0	1	18	0	0
A1	480	18208.7	1	5	8	1.10721e-08	-0.000105224
A1	481	18224.4	3	6	2	6.70307e-08	0.000258903
B2	482	18230.3	0	11	0	0	0
A1	483	18230.3	0	11	0	8.31809e-08	-0.000288411
A1	484	18237.1	3	6	2	1.27505e-07	0.000357079
B2	485	18251.1	9	1	1	0	0
A1	486	18251.1	9	1	1	1.01626e-08	0.00010081
B2	487	18258.8	0	8	5	0	0
A1	488	18259.5	0	8	5	6.61666e-09	-8.13429e-05
B2	489	18260.1	0	8	5	0	0
B2	490	18265.1	6	3	2	0	0
B2	491	18279.4	2	5	6	0	0
A1	492	18283.5	5	5	0	2.77981e-09	5.27239e-05
A1	493	18292.2	1	1	16	1.17525e-07	-0.000342819
B2	494	18303	0	1	18	0	0
A1	495	18322.6	4	4	4	8.1875e-11	-9.04848e-06
A1	496	18330.7	5	2	6	1.90428e-08	0.000137996
A1	497	18356.1	4	3	6	1.17464e-09	3.4273e-05
B2	498	18375.3	5	3	4	0	0
A1	499	18382.2	4	5	2	1.71646e-08	0.000131014
B2	500	18386.7	4	6	0	0	0
B2	501	18398.8	5	3	4	0	0
A1	502	18416.3	4	3	6	1.22464e-08	0.000110664
B2	503	18445.6	2	1	14	0	0
A1	504	18447.1	2	2	12	3.79391e-09	-6.15947e-05
B2	505	18447.2	3	2	10	0	0
A1	506	18474.5	8	1	3	2.2118e-07	0.000470298
B2	507	18474.7	8	1	3	0	0
A1	508	18478.8	3	3	8	4.01179e-08	0.000200294
A1	509	18494.9	4	4	4	1.23929e-09	3.52036e-05
B2	510	18497.6	3	4	6	0	0
B2	511	18508.6	5	4	2	0	0
A1	512	18517.9	0	7	7	2.32918e-07	-0.000482615
B2	513	18517.9	0	7	7	0	0
A1	514	18530.5	5	5	0	9.21996e-11	9.60206e-06
A1	515	18546.1	3	3	8	2.62138e-08	0.000161907
A1	516	18556.6	2	2	12	7.33075e-10	2.70754e-05
A1	517	18559.2	10	0	2	2.58394e-06	0.00160746
B2	518	18559.2	10	0	2	0	0
B2	519	18566.4	3	2	10	0	0
A1	520	18667.5	2	4	10	1.60028e-08	0.000126502
A1	521	18669.2	2	8	1	1.7027e-07	-0.000412638
B2	522	18669.3	8	2	1	0	0
B2	523	18678.8	2	1	14	0	0
B2	524	18691	7	1	5	0	0
A1	525	18691	7	1	5	4.21051e-09	6.48885e-05
B2	526	18758.7	0	6	9	0	0
A1	527	18758.8	0	6	9	9.8391e-08	0.000313673
A1	528	18825.3	10	1	0	1.51035e-09	-3.88632e-05
B2	529	18825.3	10	1	0	0	0
A1	530	18825.7	1	3	14	3.32167e-08	0.000182254
A1	531	18839.1	2	7	3	2.0013e-07	0.000447358
B2	532	18839.7	7	2	3	0	0
A1	533	18860.8	9	0	4	7.50508e-07	0.000866319
B2	534	18860.9	9	0	4	0	0
A1	535	18890.9	1	6	7	1.17235e-08	-0.000108275
B2	536	18892.2	1	6	7	0	0
A1	537	18951.6	3	7	1	6.47594e-08	0.000254479
A1	538	18962.6	5	0	11	2.3134e-08	0.000152099
B2	539	18963.4	5	0	11	0	0
B2	540	18965.7	7	3	1	0	0
A1	541	18987.2	3	6	3	1.15403e-08	-0.000107426
A1	542	18987.7	0	0	21	2.10758e-10	-1.45175e-05
B2	543	19002.4	2	6	5	0	0
A1	544	19052.1	4	4	5	4.15499e-08	-0.000203838
A1	545	19055.8	3	6	3	8.2909e-08	0.000287939
B2	546	19056.2	2	5	7	0	0
B2	547	19067.1	0	1	19	0	0
B2	548	19073.9	9	1	2	0	0
A1	549	19074.1	9	1	2	5.44657e-07	-0.000738009
A1	550	19092	0	3	15	1.78445e-08	-0.000133583
B2	551	19096.7	6	3	3	0	0
A1	552	19098.3	0	11	1	5.14603e-07	-0.000717358
B2	553	19098.6	0	11	1	0	0
A1	554	19101.9	5	5	1	3.5621e-08	0.000188735
A1	555	19112.6	5	5	1	2.30081e-08	-0.000151684
B2	556	19132.8	0	4	13	0	0
B2	557	19142.4	0	8	6	0	0
A1	558	19143.6	0	8	6	3.10139e-07	-0.000556901
A1	559	19152.4	4	5	3	1.45494e-13	3.81436e-07
B2	560	19163.1	5	3	5	0	0
B2	561	19182.2	4	2	9	0	0
A1	562	19196.2	4	5	3	3.13727e-09	-5.60113e-05
A1	563	19203.9	2	0	17	4.8657e-10	-2.20583e-05
B2	564	19208.2	4	6	1	0	0
A1	565	19223.4	4	3	7	3.78032e-09	6.14843e-05
A1	566	19231	4	5	3	9.90033e-09	-9.95004e-05
B2	567	19237.8	5	3	5	0	0
B2	568	19264.2	2	5	7	0	0
A1	569	19273.2	1	3	13	2.28534e-08	-0.000151174
A1	570	19298.7	9	2	0	1.52529e-08	-0.000123502
B2	571	19298.8	9	2	0	0	0
A1	572	19305.4	4	4	5	1.75343e-08	-0.000132417
B2	573	19314.1	2	1	15	0	0
A1	574	19326.3	8	1	4	5.84998e-09	7.64852e-05
B2	575	19326.9	8	1	4	0	0
A1	576	19332	3	3	9	2.38812e-08	0.000154535
B2	577	19335.2	5	4	3	0	0
A1	578	19350.8	5	5	1	1.12063e-09	-3.34758e-05
B2	579	19353.3	3	4	7	0	0
A1	580	19356.7	5	5	1	1.12516e-09	-3.35435e-05
B2	581	19385.9	3	2	11	0	0
A1	582	19409	3	3	9	5.91207e-08	0.000243148
B2	583	19419.2	0	7	8	0	0
A1	584	19422.7	0	7	8	2.45268e-08	-0.00015661
B2	585	19429.8	4	2	9	0	0
A1	586	19441.5	1	0	19	4.86229e-10	2.20506e-05
B2	587	19489.8	8	2	2	0	0
A1	588	19489.8	2	8	2	1.60137e-07	-0.000400171
A1	589	19526.5	2	2	13	4.25481e-09	-6.52289e-05
B2	590	19546.5	0	12	0	0	0
A1	591	19546.5	0	12	0	1.17277e-06	-0.00108295
B2	592	19552.3	0	12	0	0	0
A1	593	19552.3	0	12	0	6.85685e-07	0.000828061
B2	594	19553.4	0	2	17	0	0
A1	595	19562.7	7	1	6	1.68567e-10	1.29834e-05
B2	596	19564	7	1	6	0	0
A1	597	19581.5	1	0	19	1.69206e-09	4.11347e-05
A1	598	19645.1	3	8	0	6.52492e-09	-8.0777e-05
B2	599	19647.8	8	3	0	0	0
A1	600	19675.2	10	1	1	9.98938e-09	-9.99469e-05
B2	601	19675.6	10	1	1	0	0
A1	602	19677.8	10	1	1	2.09046e-08	-0.000144584
B2	603	19678.2	7	2	4	0	0
A1	604	19679.1	0	6	10	4.68745e-10	2.16505e-05
B2	605	19680.7	0	6	10	0	0
B2	606	19708.4	3	1	13	0	0
A1	607	19749.2	2	4	11	6.15111e-08	-0.000248014
A1	608	19762.8	3	7	2	6.42006e-08	0.000253378
B2	609	19779.3	2	6	6	0	0
B2	610	19782.2	7	3	2	0	0
A1	611	19784	6	2	6	1.02395e-08	-0.00010119
A1	612	19829.5	5	6	0	1.14631e-08	0.000107066
A1	613	19832.4	3	6	4	1.47376e-08	0.000121399
B2	614	19865.5	6	3	4	0	0
A1	615	19876.7	0	0	22	1.99159e-09	-4.46272e-05
B2	616	19892.2	0	4	12	0	0
A1	617	19895	0	4	12	2.67175e-09	-5.1689e-05
A1	618	19899.3	5	5	2	3.61673e-08	0.000190177
B2	619	19903.5	7	4	0	0	0
A1	620	19930.5	5	5	2	9.53448e-10	-3.0878e-05
B2	621	19939.1	6	3	4	0	0
A1	622	19941.3	1	3	15	1.23362e-09	3.51229e-05
A1	623	19948.4	4	4	6	1.80814e-08	0.000134467
B2	624	19966.3	2	5	8	0	0
B2	625	19967.4	0	1	20	0	0
B2	626	19975.4	0	11	2	0	0
A1	627	19975.5	0	11	2	6.23604e-07	0.000789686

## Sheet: TSR
Gamma	NN	E-ZPE, cm-1	v1	v2	v3	Density	Density
A1	1	0	0	0	0	0.411464	-0.641455
A1	2	998.608	0	0	1	0.453111	0.673135
A1	3	1978.35	0	0	2	0.0782594	0.279749
B2	4	1993	0	1	0	0	0
A1	5	2005.54	1	0	0	0.0229301	-0.151427
A1	6	2951.68	0	0	3	0.000529892	-0.0230194
B2	7	2974.73	0	1	1	0	0
A1	8	2998.78	1	0	1	0.00723917	-0.0850833
A1	9	3907.79	2	0	0	0.00140294	-0.0374559
B2	10	3913.39	0	2	0	0	0
A1	11	3923.64	2	0	0	0.0038385	0.0619556
B2	12	3952.47	0	1	2	0	0
A1	13	3975.99	1	1	0	0.00954661	0.0977068
A1	14	3996.33	1	1	0	0.00551646	0.0742729
A1	15	4861.11	1	0	3	0.000823826	-0.0287024
B2	16	4873.17	0	2	1	0	0
A1	17	4889.76	2	0	1	0.00104797	0.0323724
B2	18	4924.73	0	1	3	0	0
A1	19	4941.7	1	1	1	0.0007674	0.027702
A1	20	4978.54	1	0	3	0.000232507	-0.0152482
A1	21	5768.07	0	3	0	6.37588e-07	0.000798491
B2	22	5768.23	0	3	0	0	0
A1	23	5805.81	1	0	4	5.4659e-08	0.000233793
B2	24	5825.27	0	2	2	0	0
A1	25	5848.65	2	0	2	3.53764e-05	0.00594781
A1	26	5888.69	1	1	2	0.000143874	0.0119947
B2	27	5889.45	0	1	4	0	0
B2	28	5911.15	2	1	0	0	0
A1	29	5912.98	1	2	0	0.000437874	0.0209254
A1	30	5956.65	1	0	4	0.000939639	0.0306535
A1	31	6710.83	0	3	1	5.82837e-07	0.000763437
B2	32	6711.68	0	3	1	0	0
A1	33	6742.71	1	0	5	8.75331e-05	-0.00935592
B2	34	6770.28	0	2	3	0	0
A1	35	6799.86	2	0	3	0.000248777	0.0157727
A1	36	6830.3	1	1	3	0.000124844	0.0111734
B2	37	6843.9	0	1	5	0	0
B2	38	6865.35	2	1	1	0	0
A1	39	6871.13	1	2	1	0.000458811	0.0214199
A1	40	6927.95	1	0	5	0.000366151	0.0191351
A1	41	7554.39	0	4	0	3.30308e-08	-0.000181744
B2	42	7554.39	0	4	0	0	0
A1	43	7642.6	0	3	2	7.93773e-07	-0.00089094
B2	44	7645.71	0	3	2	0	0
A1	45	7672.75	1	0	6	1.49223e-05	0.00386294
B2	46	7708.28	0	2	4	0	0
A1	47	7740.73	2	0	4	2.38244e-05	-0.00488102
A1	48	7749.7	1	3	0	2.24178e-06	-0.00149726
B2	49	7754.76	3	1	0	0	0
A1	50	7770.5	1	1	4	4.15291e-07	0.00064443
B2	51	7788.84	0	1	6	0	0
A1	52	7813.91	2	2	0	2.47421e-10	-1.57296e-05
B2	53	7817.65	2	1	2	0	0
A1	54	7834.51	2	2	0	1.04151e-06	-0.00102054
A1	55	7892.36	1	0	6	3.2976e-05	0.00574247
A1	56	8481.19	0	4	1	2.9582e-08	-0.000171994
B2	57	8481.2	0	4	1	0	0
A1	58	8562.82	0	3	3	7.5878e-07	-0.00087108
B2	59	8570.64	0	3	3	0	0
A1	60	8596.63	0	3	3	1.99049e-06	0.00141085
B2	61	8639.02	0	2	5	0	0
A1	62	8664.62	1	2	3	1.20166e-05	0.0034665
A1	63	8681.32	2	0	5	1.00097e-05	-0.00316381
B2	64	8682.62	3	1	1	0	0
A1	65	8706.39	1	1	5	7.01008e-06	-0.00264766
B2	66	8725.99	0	1	7	0	0
A1	67	8745.08	2	2	1	4.88191e-05	-0.00698707
B2	68	8764.63	2	1	3	0	0
A1	69	8780.1	2	2	1	7.23612e-05	-0.00850654
A1	70	8849.34	1	0	7	0.000107713	0.0103785
A1	71	9272.79	5	0	0	1.81066e-09	-4.25519e-05
B2	72	9272.79	5	0	0	0	0
A1	73	9398.89	0	4	2	1.2582e-08	0.000112169
B2	74	9398.94	0	4	2	0	0
A1	75	9471.66	0	3	4	1.3185e-06	-0.00114826
B2	76	9486.61	0	3	4	0	0
A1	77	9513.96	0	3	4	2.76932e-06	0.00166413
A1	78	9534.71	1	4	0	7.01627e-09	8.37632e-05
B2	79	9535.43	4	1	0	0	0
B2	80	9562.04	0	2	6	0	0
A1	81	9576.55	1	2	4	6.61665e-06	-0.00257229
B2	82	9603.05	3	1	2	0	0
A1	83	9606.01	2	0	6	1.17025e-05	0.00342089
A1	84	9635.37	1	1	6	5.32409e-07	0.000729664
A1	85	9652.17	2	3	0	6.96947e-07	-0.000834834
B2	86	9654.85	0	1	8	0	0
A1	87	9673.52	2	2	2	1.04304e-05	0.00322962
B2	88	9686.16	3	2	0	0	0
B2	89	9705.21	2	1	4	0	0
A1	90	9720.36	2	2	2	8.77543e-06	-0.00296233
A1	91	9798.51	1	0	8	1.29935e-06	0.00113989
A1	92	10181.6	5	0	1	1.27993e-09	-3.57761e-05
B2	93	10181.6	5	0	1	0	0
A1	94	10307.5	0	4	3	1.91151e-09	-4.37208e-05
B2	95	10307.7	0	4	3	0	0
A1	96	10369.8	1	0	9	3.77939e-10	-1.94407e-05
B2	97	10393.7	0	3	5	0	0
A1	98	10423.6	0	3	5	4.5893e-09	-6.77444e-05
A1	99	10444	1	4	1	1.82907e-09	-4.27676e-05
B2	100	10445.7	4	1	1	0	0
B2	101	10476.7	0	1	9	0	0
A1	102	10480.2	1	2	5	3.01897e-08	-0.000173752
B2	103	10516.7	3	1	3	0	0
A1	104	10520.9	1	3	3	3.71618e-08	0.000192774
A1	105	10553.5	2	3	1	7.18727e-07	0.000847778
A1	106	10567.6	2	2	3	1.76005e-08	-0.000132667
B2	107	10574.2	0	1	9	0	0
A1	108	10594	2	3	1	3.64889e-06	-0.00191021
B2	109	10603	3	2	1	0	0
B2	110	10638.2	2	1	5	0	0
A1	111	10652.9	2	2	3	9.45974e-06	0.00307567
A1	112	10739.5	1	1	7	1.79712e-05	-0.00423924
A1	113	10924.6	0	6	0	1.75376e-10	-1.3243e-05
B2	114	10924.6	0	6	0	0	0
A1	115	11081.7	5	0	2	1.99354e-10	1.41193e-05
B2	116	11081.7	5	0	2	0	0
A1	117	11206.5	0	4	4	9.71615e-10	3.11707e-05
B2	118	11207.2	0	4	4	0	0
A1	119	11248.1	1	5	0	4.02635e-12	2.00658e-06
B2	120	11248.2	1	5	0	0	0
A1	121	11257.8	1	0	10	3.06778e-07	-0.000553876
B2	122	11291.8	0	3	6	0	0
A1	123	11323.9	0	3	6	4.18923e-07	0.000647243
A1	124	11342.5	1	4	2	2.12756e-08	0.000145861
B2	125	11346.7	4	1	2	0	0
A1	126	11377.1	1	2	6	9.90195e-07	0.000995086
B2	127	11382.2	0	1	10	0	0
A1	128	11422.6	2	4	0	2.07941e-06	-0.00144202
B2	129	11423.7	3	1	4	0	0
A1	130	11431	2	4	0	8.21813e-07	-0.000906539
B2	131	11446.9	4	2	0	0	0
A1	132	11461.7	2	3	2	2.63775e-07	-0.00051359
A1	133	11482.8	2	2	4	2.49723e-08	-0.000158026
B2	134	11483.4	0	1	10	0	0
A1	135	11504.2	2	3	2	5.40229e-06	0.00232428
B2	136	11515.7	3	2	2	0	0
A1	137	11527.6	3	3	0	7.46657e-07	0.000864093
B2	138	11563.2	2	1	6	0	0
A1	139	11577.3	2	2	4	6.60455e-06	-0.00256993
A1	140	11671.8	1	1	8	3.61692e-06	0.00190182
A1	141	11814.5	0	6	1	1.7614e-10	-1.32718e-05
B2	142	11814.5	0	6	1	0	0
B2	143	11973.3	5	0	3	0	0
A1	144	11973.3	5	0	3	7.11682e-11	-8.43612e-06
A1	145	12095	0	4	5	2.21549e-09	-4.7069e-05
B2	146	12097.3	0	4	5	0	0
A1	147	12136.2	1	0	11	4.53501e-08	-0.000212956
A1	148	12140.6	1	5	1	5.87364e-11	-7.66397e-06
B2	149	12140.6	1	5	1	0	0
B2	150	12180.8	0	2	9	0	0
A1	151	12212.8	0	3	7	4.9136e-08	-0.000221666
A1	152	12231.3	1	4	3	6.43244e-10	-2.53623e-05
B2	153	12238.6	4	1	3	0	0
A1	154	12267.7	1	4	3	9.07412e-08	0.000301233
B2	155	12278.1	0	1	11	0	0
A1	156	12311.1	2	4	1	1.25958e-07	-0.000354906
B2	157	12323.6	3	1	5	0	0
A1	158	12326.4	2	4	1	1.78819e-07	0.00042287
B2	159	12341.9	4	2	1	0	0
A1	160	12362.3	1	1	9	5.79276e-08	-0.000240681
B2	161	12383.1	0	1	11	0	0
A1	162	12391.9	2	2	5	7.89833e-08	0.00028104
A1	163	12402.5	3	3	1	8.98835e-10	2.99806e-05
B2	164	12422.5	3	2	3	0	0
A1	165	12429.6	3	3	1	4.02466e-09	-6.34402e-05
B2	166	12479.8	2	1	7	0	0
A1	167	12493	2	2	5	3.32501e-07	0.000576629
A1	168	12510.8	0	7	0	4.7437e-11	6.88746e-06
B2	169	12510.8	0	7	0	0	0
A1	170	12595	1	1	9	1.80658e-06	-0.00134409
A1	171	12696.2	0	6	2	5.27559e-11	-7.26333e-06
B2	172	12696.2	0	6	2	0	0
B2	173	12856.2	5	0	4	0	0
A1	174	12856.2	5	0	4	2.16649e-10	1.4719e-05
A1	175	12893.1	1	6	0	2.59781e-12	-1.61177e-06
B2	176	12893.2	1	6	0	0	0
A1	177	12970.9	0	4	6	2.1912e-09	4.68103e-05
B2	178	12977.4	0	4	6	0	0
A1	179	13006.4	0	4	6	3.88768e-08	-0.000197172
A1	180	13023.7	1	5	2	7.50712e-12	2.73991e-06
B2	181	13023.9	1	5	2	0	0
B2	182	13060.5	0	2	10	0	0
A1	183	13088.4	1	3	6	7.31741e-08	-0.000270507
A1	184	13111.8	1	4	4	3.26442e-09	-5.71351e-05
B2	185	13121.7	4	1	4	0	0
A1	186	13141	5	2	0	1.44881e-09	-3.80633e-05
B2	187	13146.8	2	5	0	0	0
A1	188	13151.2	1	4	4	1.05582e-07	0.000324934
B2	189	13163.9	0	1	12	0	0
A1	190	13190.3	2	3	4	1.30101e-07	0.000360694
A1	191	13211.3	2	4	2	1.98033e-07	0.000445009
B2	192	13215.2	2	1	8	0	0
B2	193	13230.6	4	2	2	0	0
A1	194	13250.5	4	3	0	4.63537e-08	-0.000215299
A1	195	13259.8	4	3	0	8.49856e-08	0.000291523
B2	196	13273.2	0	1	12	0	0
A1	197	13290.1	3	3	2	7.55408e-07	0.000869142
A1	198	13293.9	1	3	6	1.40422e-07	0.000374729
B2	199	13320	3	2	4	0	0
B2	200	13326.2	3	4	0	0	0
A1	201	13326.4	3	3	2	7.90664e-07	0.000889193
A1	202	13381.4	0	7	1	1.75173e-12	-1.32353e-06
B2	203	13381.4	0	7	1	0	0
B2	204	13387.5	2	1	8	0	0
A1	205	13399.4	2	2	6	2.08116e-06	0.00144262
A1	206	13508.7	1	1	10	1.66293e-06	-0.00128955
A1	207	13569.7	0	6	3	2.86997e-11	5.35721e-06
B2	208	13569.7	0	6	3	0	0
A1	209	13730.2	5	0	5	1.0167e-10	1.00832e-05
B2	210	13730.2	5	0	5	0	0
A1	211	13766.6	1	6	1	1.50471e-12	1.22667e-06
B2	212	13766.6	1	6	1	0	0
A1	213	13831.5	0	4	7	7.11758e-09	8.43657e-05
B2	214	13847.1	0	4	7	0	0
A1	215	13869.8	0	4	7	2.92187e-08	0.000170935
A1	216	13897.6	1	5	3	8.61259e-12	2.93472e-06
B2	217	13898.2	1	5	3	0	0
B2	218	13930.4	0	2	11	0	0
A1	219	13951.5	1	3	7	3.51732e-08	-0.000187545
A1	220	13983.1	0	3	9	2.66548e-09	5.16283e-05
B2	221	13995.8	4	1	5	0	0
A1	222	14013.5	5	2	1	5.21677e-09	-7.22272e-05
B2	223	14021.8	2	5	1	0	0
A1	224	14026.3	1	4	5	7.96188e-08	-0.000282168
A1	225	14032.3	0	8	0	1.83941e-13	-4.28883e-07
B2	226	14032.3	0	8	0	0	0
B2	227	14039.1	0	1	13	0	0
A1	228	14062.9	2	3	5	5.31871e-08	0.000230623
A1	229	14085.2	2	4	3	1.28391e-07	-0.000358317
B2	230	14097.1	4	2	3	0	0
B2	231	14113.8	4	2	3	0	0
A1	232	14128	4	3	1	4.4485e-09	-6.6697e-05
A1	233	14144.6	4	3	1	2.63998e-09	5.13807e-05
B2	234	14153.3	0	1	13	0	0
A1	235	14169.3	3	3	3	1.52222e-07	-0.000390156
A1	236	14186.7	2	2	7	1.14998e-08	-0.000107237
B2	237	14200.8	3	4	1	0	0
A1	238	14215.2	3	3	3	8.87401e-08	-0.000297893
B2	239	14215.2	3	2	5	0	0
A1	240	14244.3	0	7	2	1.42613e-11	3.77641e-06
B2	241	14244.3	0	7	2	0	0
B2	242	14285.9	2	1	9	0	0
A1	243	14296.2	2	2	7	3.53249e-08	-0.000187949
A1	244	14412.3	1	2	9	6.66825e-08	-0.00025823
B2	245	14435	0	6	4	0	0
A1	246	14435	0	6	4	2.20617e-12	-1.48532e-06
A1	247	14471.1	7	1	0	1.53473e-13	3.91757e-07
B2	248	14471.2	7	1	0	0	0
A1	249	14594.9	5	0	6	6.27946e-11	7.9243e-06
B2	250	14594.9	5	0	6	0	0
B2	251	14631.2	1	6	2	0	0
A1	252	14631.2	1	6	2	4.89163e-14	2.2117e-07
A1	253	14676.1	1	0	14	8.79062e-10	-2.9649e-05
B2	254	14706	0	4	8	0	0
A1	255	14725.9	0	4	8	1.47323e-09	3.83827e-05
A1	256	14761.8	1	5	4	2.75013e-11	-5.24417e-06
B2	257	14763.3	1	5	4	0	0
A1	258	14780.7	6	2	0	9.01938e-12	-3.00323e-06
B2	259	14781.9	2	6	0	0	0
B2	260	14790.2	0	2	12	0	0
A1	261	14803.7	0	0	16	6.66723e-09	8.16531e-05
A1	262	14843.8	0	3	10	4.74459e-09	6.8881e-05
B2	263	14861.1	4	1	6	0	0
A1	264	14874.3	5	2	2	1.51572e-10	-1.23115e-05
B2	265	14883.6	0	8	1	0	0
A1	266	14883.6	0	8	1	2.19288e-11	4.68283e-06
B2	267	14888	2	5	2	0	0
A1	268	14891.3	5	2	2	4.29815e-09	6.55603e-05
B2	269	14903.6	0	1	14	0	0
A1	270	14929.2	1	4	6	5.48883e-09	7.40867e-05
A1	271	14938.8	4	4	0	1.92823e-12	1.38861e-06
A1	272	14948.6	2	4	4	9.73536e-09	9.86679e-05
B2	273	14969.1	4	2	4	0	0
B2	274	14988.5	5	3	0	0	0
B2	275	14991.6	5	3	0	0	0
A1	276	14997.9	4	3	2	1.07278e-08	0.000103575
A1	277	15020.4	4	3	2	7.07105e-08	0.000265914
B2	278	15022.8	0	1	14	0	0
A1	279	15039.5	3	3	4	7.44221e-08	-0.000272804
A1	280	15071	2	2	8	1.312e-08	0.000114543
B2	281	15072.7	3	4	2	0	0
A1	282	15091.4	4	4	0	6.83909e-08	-0.000261517
A1	283	15096.9	4	4	0	9.3912e-08	-0.000306451
B2	284	15097.6	3	2	6	0	0
A1	285	15099.6	0	7	3	2.36474e-11	4.86286e-06
B2	286	15099.7	0	7	3	0	0
B2	287	15174.7	2	1	10	0	0
A1	288	15182.7	2	3	6	4.26234e-07	-0.000652866
A1	289	15292	0	6	5	1.07123e-09	-3.27296e-05
B2	290	15292	0	6	5	0	0
A1	291	15305.4	1	2	10	4.68376e-07	-0.00068438
A1	292	15324.9	7	1	1	1.49865e-12	1.22419e-06
B2	293	15324.9	7	1	1	0	0
A1	294	15449.8	5	0	7	3.59495e-10	-1.89604e-05
B2	295	15450.1	5	0	7	0	0
B2	296	15487.1	1	6	3	0	0
A1	297	15487.1	1	6	3	9.85444e-13	9.92695e-07
B2	298	15490.3	9	0	0	0	0
A1	299	15490.3	9	0	0	9.27428e-16	3.04537e-08
A1	300	15506.6	1	0	15	6.03078e-09	7.76581e-05
B2	301	15553.7	0	3	11	0	0
A1	302	15572.4	0	4	9	1.1366e-08	0.000106612
A1	303	15615.4	1	5	5	6.80583e-11	8.24974e-06
B2	304	15618.9	1	5	5	0	0
A1	305	15635.8	6	2	1	4.60754e-11	-6.78788e-06
B2	306	15637.3	2	6	1	0	0
B2	307	15639.6	0	2	13	0	0
A1	308	15646.5	0	0	17	1.3091e-08	0.000114416
A1	309	15693.2	2	4	5	7.07821e-09	8.41321e-05
B2	310	15717.2	3	1	9	0	0
A1	311	15724.8	5	2	3	1.93164e-09	4.39505e-05
B2	312	15728.2	0	8	2	0	0
A1	313	15728.3	0	8	2	1.55072e-10	-1.24528e-05
A1	314	15745.2	5	2	3	3.43112e-08	0.000185233
B2	315	15745.6	2	5	3	0	0
B2	316	15757.1	0	1	15	0	0
A1	317	15787.8	1	4	7	1.59661e-08	-0.000126357
A1	318	15796.3	4	4	1	2.92148e-09	-5.40507e-05
A1	319	15802.7	4	3	3	2.81102e-08	0.000167661
B2	320	15831.2	4	2	5	0	0
B2	321	15847.8	5	3	1	0	0
A1	322	15858.9	4	3	3	8.61763e-15	9.28312e-08
B2	323	15860.9	4	1	7	0	0
B2	324	15881.4	0	1	15	0	0
A1	325	15884.4	4	3	3	5.8882e-08	0.000242656
A1	326	15902.7	3	3	5	5.00828e-08	-0.000223792
B2	327	15937.3	3	4	3	0	0
A1	328	15945.7	2	2	9	1.09355e-09	3.30689e-05
B2	329	15947.8	0	7	4	0	0
A1	330	15948.3	0	7	4	1.33132e-10	1.15383e-05
A1	331	15951.6	4	4	1	1.72478e-08	-0.000131331
A1	332	15966.5	3	3	5	6.90749e-08	0.000262821
B2	333	15970.9	3	2	7	0	0
A1	334	15983.1	8	1	0	8.46075e-13	9.19824e-07
B2	335	15983.1	8	1	0	0	0
B2	336	16053.4	2	1	11	0	0
A1	337	16058.7	2	3	7	8.27172e-08	0.000287606
A1	338	16141.1	0	6	6	3.22353e-12	-1.79542e-06
B2	339	16141.1	0	6	6	0	0
A1	340	16170.4	7	1	2	9.61798e-13	-9.80713e-07
B2	341	16170.4	7	1	2	0	0
A1	342	16187.7	1	2	11	3.04885e-09	5.52164e-05
A1	343	16294.6	5	0	8	3.22171e-11	5.67601e-06
B2	344	16296	5	0	8	0	0
A1	345	16323.1	9	0	1	1.87561e-13	4.33083e-07
B2	346	16323.1	9	0	1	0	0
A1	347	16324.4	0	0	18	4.97733e-13	7.05502e-07
A1	348	16335.4	1	6	4	2.22975e-12	-1.49323e-06
B2	349	16335.4	1	6	4	0	0
A1	350	16349.6	2	7	0	1.2758e-12	1.12951e-06
B2	351	16349.9	7	2	0	0	0
B2	352	16390.9	0	3	12	0	0
A1	353	16408.2	0	0	18	1.41175e-10	-1.18817e-05
A1	354	16457.8	1	5	6	6.12071e-11	7.82349e-06
B2	355	16464.6	1	5	6	0	0
B2	356	16480.4	0	4	10	0	0
A1	357	16480.5	6	2	2	9.54486e-11	9.76978e-06
A1	358	16482.9	6	2	2	2.46084e-10	1.56871e-05
B2	359	16483.7	2	6	2	0	0
A1	360	16532.9	2	4	6	4.06466e-10	-2.0161e-05
B2	361	16564.6	3	1	10	0	0
A1	362	16564.9	3	6	0	1.97418e-10	1.40506e-05
A1	363	16568.9	0	8	3	1.28914e-12	1.1354e-06
B2	364	16569.1	0	8	3	0	0
A1	365	16569.8	3	6	0	1.41234e-10	-1.18842e-05
A1	366	16589.2	1	1	14	7.72985e-10	2.78026e-05
B2	367	16595.1	2	5	4	0	0
B2	368	16597.9	6	3	0	0	0
B2	369	16601.7	0	1	16	0	0
A1	370	16636.9	1	4	8	1.32482e-10	-1.15101e-05
A1	371	16644.4	4	4	2	1.00626e-11	3.17216e-06
A1	372	16653	4	3	4	5.02495e-11	7.08869e-06
B2	373	16684	4	2	6	0	0
B2	374	16700.1	5	3	2	0	0
A1	375	16708	4	5	0	1.47804e-09	3.84452e-05
A1	376	16713.2	4	5	0	3.09853e-09	-5.56644e-05
B2	377	16723	4	1	8	0	0
B2	378	16730.6	3	2	8	0	0
A1	379	16735.6	4	3	4	1.11388e-08	0.000105541
A1	380	16761.1	3	3	6	1.11758e-10	-1.05716e-05
A1	381	16793	0	7	5	5.3673e-11	7.32618e-06
B2	382	16793	0	7	5	0	0
B2	383	16794.5	3	4	4	0	0
A1	384	16804	4	4	2	2.43668e-09	4.93627e-05
A1	385	16813.1	2	2	10	5.98823e-09	7.73837e-05
A1	386	16817.2	8	1	1	5.82199e-12	-2.41288e-06
B2	387	16817.2	8	1	1	0	0
A1	388	16827.7	3	3	6	1.42846e-08	-0.000119518
B2	389	16828.3	5	4	0	0	0
B2	390	16835.5	3	2	8	0	0
A1	391	16885.8	10	0	0	9.40393e-13	-9.69739e-07
B2	392	16885.8	10	0	0	0	0
B2	393	16922.9	2	1	12	0	0
A1	394	16925.1	2	3	8	6.20298e-08	0.000249058
A1	395	16986.4	0	6	7	1.66351e-10	1.28977e-05
B2	396	16986.5	0	6	7	0	0
B2	397	17009.4	7	1	3	0	0
A1	398	17009.4	7	1	3	3.70676e-12	-1.92529e-06
A1	399	17059.4	1	2	12	1.05534e-07	0.000324859
A1	400	17136.7	5	0	9	4.49007e-10	-2.11898e-05
B2	401	17138.7	5	0	9	0	0
A1	402	17152.1	9	0	2	1.41458e-12	-1.18936e-06
B2	403	17152.1	9	0	2	0	0
A1	404	17161.5	0	0	19	3.38705e-09	-5.81984e-05
A1	405	17176.8	1	6	5	7.22448e-13	8.4997e-07
B2	406	17176.9	1	6	5	0	0
A1	407	17185.2	2	7	1	1.85945e-12	-1.36362e-06
B2	408	17185.5	7	2	1	0	0
B2	409	17232.4	0	3	13	0	0
A1	410	17247.3	0	0	19	4.02434e-09	-6.34377e-05
A1	411	17293.4	1	5	7	1.57059e-11	3.96307e-06
B2	412	17304.4	1	5	7	0	0
A1	413	17317.3	6	2	3	6.00054e-10	-2.4496e-05
B2	414	17320.8	2	6	3	0	0
B2	415	17322.6	2	6	3	0	0
A1	416	17324.2	6	2	3	4.04276e-09	6.35827e-05
A1	417	17372.6	1	5	7	4.36354e-09	-6.60571e-05
A1	418	17398.5	3	6	1	1.30153e-10	-1.14084e-05
B2	419	17405.3	0	8	4	0	0
A1	420	17405.6	0	8	4	6.7059e-12	2.58957e-06
A1	421	17406.6	3	6	1	2.58552e-14	1.60795e-07
B2	422	17409.6	3	1	11	0	0
B2	423	17430.6	9	1	0	0	0
A1	424	17430.6	9	1	0	1.80704e-10	1.34426e-05
A1	425	17431.1	1	1	15	8.09736e-09	8.99853e-05
B2	426	17435.1	6	3	1	0	0
B2	427	17439.1	2	5	5	0	0
B2	428	17444	0	1	17	0	0
A1	429	17484.1	4	3	5	9.22597e-09	9.60519e-05
A1	430	17486.8	4	4	3	7.61733e-10	2.75995e-05
A1	431	17502.9	4	3	5	7.98287e-10	-2.8254e-05
B2	432	17531.4	5	3	3	0	0
B2	433	17547.5	5	3	3	0	0
A1	434	17548.4	4	5	1	1.01518e-10	-1.00756e-05
A1	435	17561.2	4	5	1	1.89761e-09	-4.35616e-05
B2	436	17575.6	2	1	13	0	0
B2	437	17582.3	3	2	9	0	0
A1	438	17583.5	4	3	5	3.33153e-08	-0.000182525
A1	439	17617.9	3	3	7	2.1135e-09	-4.59728e-05
A1	440	17634.9	0	7	6	3.63204e-12	-1.90579e-06
B2	441	17635	0	7	6	0	0
A1	442	17644.6	8	1	2	5.40288e-12	2.32441e-06
B2	443	17644.6	8	1	2	0	0
B2	444	17645.4	3	4	5	0	0
A1	445	17651.1	4	4	3	6.85262e-09	8.27805e-05
B2	446	17670.3	5	4	1	0	0
A1	447	17678.1	2	2	11	2.26599e-10	1.50532e-05
A1	448	17686.8	3	3	7	3.23503e-08	-0.000179862
B2	449	17696	3	2	9	0	0
A1	450	17707.4	10	0	1	4.31926e-13	6.57211e-07
B2	451	17707.4	10	0	1	0	0
B2	452	17792.8	3	1	11	0	0
A1	453	17794.5	2	4	9	4.64967e-08	-0.000215631
B2	454	17830	0	6	8	0	0
A1	455	17830	0	6	8	7.9933e-11	-8.94053e-06
B2	456	17841.4	7	1	4	0	0
A1	457	17841.4	7	1	4	4.4068e-12	-2.09924e-06
A1	458	17851.4	2	8	0	1.90013e-13	-4.35905e-07
B2	459	17851.5	8	2	0	0	0
A1	460	17937.3	1	3	13	1.05932e-08	0.000102923
A1	461	17966.2	0	0	20	1.9217e-10	-1.38625e-05
B2	462	17978.5	5	0	10	0	0
A1	463	17987.4	5	0	10	4.38009e-12	2.09287e-06
B2	464	17988.6	9	0	3	0	0
A1	465	17988.7	9	0	3	3.83559e-12	1.95847e-06
A1	466	18010.4	1	6	6	1.52516e-12	1.23497e-06
B2	467	18010.8	1	6	6	0	0
A1	468	18012.4	2	7	2	1.82636e-13	-4.2736e-07
B2	469	18012.7	7	2	2	0	0
B2	470	18069.4	0	2	16	0	0
A1	471	18083.8	0	0	20	4.35505e-10	2.08688e-05
A1	472	18123.2	5	2	6	6.40807e-11	-8.00504e-06
A1	473	18135.4	3	7	0	1.05135e-13	-3.24246e-07
B2	474	18140.2	2	5	6	0	0
A1	475	18146.1	6	2	4	1.54216e-12	1.24184e-06
B2	476	18147.6	7	3	0	0	0
B2	477	18152.4	2	6	4	0	0
A1	478	18169.7	0	0	20	5.37501e-12	-2.31841e-06
B2	479	18173	0	1	18	0	0
A1	480	18208.7	1	5	8	4.90809e-11	7.00577e-06
A1	481	18224.4	3	6	2	1.09186e-12	-1.04492e-06
B2	482	18230.3	0	11	0	0	0
A1	483	18230.3	0	11	0	4.78456e-13	6.91705e-07
A1	484	18237.1	3	6	2	1.30228e-13	3.60872e-07
B2	485	18251.1	9	1	1	0	0
A1	486	18251.1	9	1	1	1.14735e-12	1.07115e-06
B2	487	18258.8	0	8	5	0	0
A1	488	18259.5	0	8	5	3.60495e-13	6.00412e-07
B2	489	18260.1	0	8	5	0	0
B2	490	18265.1	6	3	2	0	0
B2	491	18279.4	2	5	6	0	0
A1	492	18283.5	5	5	0	1.56445e-11	3.95532e-06
A1	493	18292.2	1	1	16	9.19441e-10	-3.03223e-05
B2	494	18303	0	1	18	0	0
A1	495	18322.6	4	4	4	3.22415e-10	-1.79559e-05
A1	496	18330.7	5	2	6	1.07819e-11	3.28357e-06
A1	497	18356.1	4	3	6	2.28356e-10	-1.51115e-05
B2	498	18375.3	5	3	4	0	0
A1	499	18382.2	4	5	2	3.92216e-11	-6.26272e-06
B2	500	18386.7	4	6	0	0	0
B2	501	18398.8	5	3	4	0	0
A1	502	18416.3	4	3	6	3.7182e-10	1.92826e-05
B2	503	18445.6	2	1	14	0	0
A1	504	18447.1	2	2	12	1.63945e-10	-1.28041e-05
B2	505	18447.2	3	2	10	0	0
A1	506	18474.5	8	1	3	2.93601e-11	5.4185e-06
B2	507	18474.7	8	1	3	0	0
A1	508	18478.8	3	3	8	7.10522e-10	2.66556e-05
A1	509	18494.9	4	4	4	1.03115e-11	-3.21116e-06
B2	510	18497.6	3	4	6	0	0
B2	511	18508.6	5	4	2	0	0
A1	512	18517.9	0	7	7	2.62586e-11	-5.12431e-06
B2	513	18517.9	0	7	7	0	0
A1	514	18530.5	5	5	0	1.29862e-13	-3.60363e-07
A1	515	18546.1	3	3	8	2.16522e-12	-1.47147e-06
A1	516	18556.6	2	2	12	2.92729e-09	5.41044e-05
A1	517	18559.2	10	0	2	4.59501e-13	6.77865e-07
B2	518	18559.2	10	0	2	0	0
B2	519	18566.4	3	2	10	0	0
A1	520	18667.5	2	4	10	6.66848e-09	8.16608e-05
A1	521	18669.2	2	8	1	5.07572e-13	-7.12441e-07
B2	522	18669.3	8	2	1	0	0
B2	523	18678.8	2	1	14	0	0
B2	524	18691	7	1	5	0	0
A1	525	18691	7	1	5	1.17449e-11	3.42709e-06
B2	526	18758.7	0	6	9	0	0
A1	527	18758.8	0	6	9	2.61521e-11	5.11391e-06
A1	528	18825.3	10	1	0	7.36107e-12	-2.71313e-06
B2	529	18825.3	10	1	0	0	0
A1	530	18825.7	1	3	14	3.17436e-08	0.000178167
A1	531	18839.1	2	7	3	7.07677e-13	8.41236e-07
B2	532	18839.7	7	2	3	0	0
A1	533	18860.8	9	0	4	1.74285e-12	1.32017e-06
B2	534	18860.9	9	0	4	0	0
A1	535	18890.9	1	6	7	7.26658e-12	-2.69566e-06
B2	536	18892.2	1	6	7	0	0
A1	537	18951.6	3	7	1	2.84132e-14	1.68562e-07
A1	538	18962.6	5	0	11	4.85727e-11	6.96941e-06
B2	539	18963.4	5	0	11	0	0
B2	540	18965.7	7	3	1	0	0
A1	541	18987.2	3	6	3	1.36411e-09	-3.69338e-05
A1	542	18987.7	0	0	21	4.06226e-09	6.37358e-05
B2	543	19002.4	2	6	5	0	0
A1	544	19052.1	4	4	5	5.87857e-11	-7.66718e-06
A1	545	19055.8	3	6	3	4.51344e-12	-2.12449e-06
B2	546	19056.2	2	5	7	0	0
B2	547	19067.1	0	1	19	0	0
B2	548	19073.9	9	1	2	0	0
A1	549	19074.1	9	1	2	3.44573e-14	1.85627e-07
A1	550	19092	0	3	15	3.4355e-11	-5.86131e-06
B2	551	19096.7	6	3	3	0	0
A1	552	19098.3	0	11	1	1.51707e-12	1.23169e-06
B2	553	19098.6	0	11	1	0	0
A1	554	19101.9	5	5	1	2.30433e-12	1.518e-06
A1	555	19112.6	5	5	1	6.95999e-14	-2.63818e-07
B2	556	19132.8	0	4	13	0	0
B2	557	19142.4	0	8	6	0	0
A1	558	19143.6	0	8	6	2.33114e-11	-4.82819e-06
A1	559	19152.4	4	5	3	7.61946e-10	2.76034e-05
B2	560	19163.1	5	3	5	0	0
B2	561	19182.2	4	2	9	0	0
A1	562	19196.2	4	5	3	5.37981e-10	2.31944e-05
A1	563	19203.9	2	0	17	1.39221e-09	-3.73123e-05
B2	564	19208.2	4	6	1	0	0
A1	565	19223.4	4	3	7	6.1499e-10	2.4799e-05
A1	566	19231	4	5	3	1.79716e-09	4.23929e-05
B2	567	19237.8	5	3	5	0	0
B2	568	19264.2	2	5	7	0	0
A1	569	19273.2	1	3	13	1.06962e-10	-1.03422e-05
A1	570	19298.7	9	2	0	8.39923e-13	9.16473e-07
B2	571	19298.8	9	2	0	0	0
A1	572	19305.4	4	4	5	3.42362e-09	-5.85117e-05
B2	573	19314.1	2	1	15	0	0
A1	574	19326.3	8	1	4	1.59484e-12	-1.26287e-06
B2	575	19326.9	8	1	4	0	0
A1	576	19332	3	3	9	1.0248e-09	3.20125e-05
B2	577	19335.2	5	4	3	0	0
A1	578	19350.8	5	5	1	6.67012e-10	-2.58266e-05
B2	579	19353.3	3	4	7	0	0
A1	580	19356.7	5	5	1	3.94646e-10	-1.98657e-05
B2	581	19385.9	3	2	11	0	0
A1	582	19409	3	3	9	1.69116e-09	4.11237e-05
B2	583	19419.2	0	7	8	0	0
A1	584	19422.7	0	7	8	8.8441e-10	2.9739e-05
B2	585	19429.8	4	2	9	0	0
A1	586	19441.5	1	0	19	4.84102e-09	-6.95774e-05
B2	587	19489.8	8	2	2	0	0
A1	588	19489.8	2	8	2	6.49809e-13	-8.06107e-07
A1	589	19526.5	2	2	13	2.80048e-10	1.67346e-05
B2	590	19546.5	0	12	0	0	0
A1	591	19546.5	0	12	0	2.54713e-14	-1.59597e-07
B2	592	19552.3	0	12	0	0	0
A1	593	19552.3	0	12	0	1.08964e-12	1.04386e-06
B2	594	19553.4	0	2	17	0	0
A1	595	19562.7	7	1	6	3.35048e-10	-1.83043e-05
B2	596	19564	7	1	6	0	0
A1	597	19581.5	1	0	19	8.76625e-09	9.36282e-05
A1	598	19645.1	3	8	0	1.17056e-14	-1.08192e-07
B2	599	19647.8	8	3	0	0	0
A1	600	19675.2	10	1	1	5.47476e-12	-2.33982e-06
B2	601	19675.6	10	1	1	0	0
A1	602	19677.8	10	1	1	1.19102e-11	-3.45111e-06
B2	603	19678.2	7	2	4	0	0
A1	604	19679.1	0	6	10	1.3343e-11	3.6528e-06
B2	605	19680.7	0	6	10	0	0
B2	606	19708.4	3	1	13	0	0
A1	607	19749.2	2	4	11	1.25537e-08	-0.000112043
A1	608	19762.8	3	7	2	1.77107e-14	-1.33082e-07
B2	609	19779.3	2	6	6	0	0
B2	610	19782.2	7	3	2	0	0
A1	611	19784	6	2	6	2.03996e-10	-1.42827e-05
A1	612	19829.5	5	6	0	4.61246e-12	-2.14766e-06
A1	613	19832.4	3	6	4	2.2214e-11	-4.71317e-06
B2	614	19865.5	6	3	4	0	0
A1	615	19876.7	0	0	22	7.8807e-10	-2.80726e-05
B2	616	19892.2	0	4	12	0	0
A1	617	19895	0	4	12	1.27771e-10	-1.13036e-05
A1	618	19899.3	5	5	2	8.04399e-13	-8.96883e-07
B2	619	19903.5	7	4	0	0	0
A1	620	19930.5	5	5	2	3.67897e-12	-1.91807e-06
B2	621	19939.1	6	3	4	0	0
A1	622	19941.3	1	3	15	1.54236e-09	-3.92729e-05
A1	623	19948.4	4	4	6	7.62471e-12	-2.76129e-06
B2	624	19966.3	2	5	8	0	0
B2	625	19967.4	0	1	20	0	0
B2	626	19975.4	0	11	2	0	0
A1	627	19975.5	0	11	2	3.61491e-14	1.90129e-07

## Sheet: TS-L
Gamma	NN	E-ZPE, cm-1	v1	v2	v3	Density	Density
A1	1	0	0	0	0	0.140267	-0.374522
A1	2	998.608	0	0	1	0.352874	0.594032
A1	3	1978.35	0	0	2	0.238401	0.488264
B2	4	1993	0	1	0	0	0
A1	5	2005.54	1	0	0	0.0860685	-0.293374
A1	6	2951.68	0	0	3	0.118798	-0.344671
B2	7	2974.73	0	1	1	0	0
A1	8	2998.78	1	0	1	0.0115842	0.10763
A1	9	3907.79	2	0	0	0.0154004	0.124098
B2	10	3913.39	0	2	0	0	0
A1	11	3923.64	2	0	0	0.00982287	-0.0991104
B2	12	3952.47	0	1	2	0	0
A1	13	3975.99	1	1	0	0.00132999	0.036469
A1	14	3996.33	1	1	0	0.00240922	0.0490838
A1	15	4861.11	1	0	3	0.00196445	0.0443221
B2	16	4873.17	0	2	1	0	0
A1	17	4889.76	2	0	1	0.000396363	0.0199089
B2	18	4924.73	0	1	3	0	0
A1	19	4941.7	1	1	1	0.00583722	0.0764017
A1	20	4978.54	1	0	3	0.00562556	-0.0750037
A1	21	5768.07	0	3	0	3.68682e-05	-0.00607192
B2	22	5768.23	0	3	0	0	0
A1	23	5805.81	1	0	4	1.59147e-05	0.00398932
B2	24	5825.27	0	2	2	0	0
A1	25	5848.65	2	0	2	0.00230912	-0.0480533
A1	26	5888.69	1	1	2	0.00129474	-0.0359824
B2	27	5889.45	0	1	4	0	0
B2	28	5911.15	2	1	0	0	0
A1	29	5912.98	1	2	0	0.00194799	-0.044136
A1	30	5956.65	1	0	4	0.000684265	-0.0261585
A1	31	6710.83	0	3	1	1.84889e-05	0.00429988
B2	32	6711.68	0	3	1	0	0
A1	33	6742.71	1	0	5	0.000228534	0.0151173
B2	34	6770.28	0	2	3	0	0
A1	35	6799.86	2	0	3	0.000779946	-0.0279275
A1	36	6830.3	1	1	3	0.000136381	-0.0116782
B2	37	6843.9	0	1	5	0	0
B2	38	6865.35	2	1	1	0	0
A1	39	6871.13	1	2	1	1.87412e-05	-0.00432911
A1	40	6927.95	1	0	5	0.000261403	0.016168
A1	41	7554.39	0	4	0	4.324e-07	0.000657571
B2	42	7554.39	0	4	0	0	0
A1	43	7642.6	0	3	2	1.63292e-06	-0.00127786
B2	44	7645.71	0	3	2	0	0
A1	45	7672.75	1	0	6	7.21865e-05	-0.00849627
B2	46	7708.28	0	2	4	0	0
A1	47	7740.73	2	0	4	9.51216e-07	0.000975303
A1	48	7749.7	1	3	0	1.22414e-06	-0.00110641
B2	49	7754.76	3	1	0	0	0
A1	50	7770.5	1	1	4	1.55168e-06	0.00124566
B2	51	7788.84	0	1	6	0	0
A1	52	7813.91	2	2	0	0.000198612	-0.014093
B2	53	7817.65	2	1	2	0	0
A1	54	7834.51	2	2	0	0.000178348	0.0133547
A1	55	7892.36	1	0	6	0.000425743	-0.0206336
A1	56	8481.19	0	4	1	8.38124e-07	0.000915491
B2	57	8481.2	0	4	1	0	0
A1	58	8562.82	0	3	3	1.76258e-07	0.000419831
B2	59	8570.64	0	3	3	0	0
A1	60	8596.63	0	3	3	2.96333e-07	0.000544365
B2	61	8639.02	0	2	5	0	0
A1	62	8664.62	1	2	3	3.98604e-05	-0.00631351
A1	63	8681.32	2	0	5	8.10665e-05	0.00900369
B2	64	8682.62	3	1	1	0	0
A1	65	8706.39	1	1	5	3.52508e-06	0.00187752
B2	66	8725.99	0	1	7	0	0
A1	67	8745.08	2	2	1	0.000117993	0.0108624
B2	68	8764.63	2	1	3	0	0
A1	69	8780.1	2	2	1	0.000113953	0.0106749
A1	70	8849.34	1	0	7	1.94021e-05	-0.00440478
A1	71	9272.79	5	0	0	1.48438e-09	3.85277e-05
B2	72	9272.79	5	0	0	0	0
A1	73	9398.89	0	4	2	5.46106e-07	-0.00073899
B2	74	9398.94	0	4	2	0	0
A1	75	9471.66	0	3	4	9.9991e-08	0.000316214
B2	76	9486.61	0	3	4	0	0
A1	77	9513.96	0	3	4	6.4904e-06	-0.00254763
A1	78	9534.71	1	4	0	6.21284e-10	-2.49256e-05
B2	79	9535.43	4	1	0	0	0
B2	80	9562.04	0	2	6	0	0
A1	81	9576.55	1	2	4	1.26274e-05	0.0035535
B2	82	9603.05	3	1	2	0	0
A1	83	9606.01	2	0	6	3.76035e-05	-0.00613217
A1	84	9635.37	1	1	6	1.48293e-12	-1.21776e-06
A1	85	9652.17	2	3	0	6.81255e-07	0.000825382
B2	86	9654.85	0	1	8	0	0
A1	87	9673.52	2	2	2	4.24722e-06	-0.00206088
B2	88	9686.16	3	2	0	0	0
B2	89	9705.21	2	1	4	0	0
A1	90	9720.36	2	2	2	1.51559e-06	-0.00123109
A1	91	9798.51	1	0	8	4.2277e-05	0.00650207
A1	92	10181.6	5	0	1	8.22393e-09	9.06859e-05
B2	93	10181.6	5	0	1	0	0
A1	94	10307.5	0	4	3	6.50535e-08	0.000255056
B2	95	10307.7	0	4	3	0	0
A1	96	10369.8	1	0	9	5.77568e-09	-7.59979e-05
B2	97	10393.7	0	3	5	0	0
A1	98	10423.6	0	3	5	3.30834e-06	0.00181889
A1	99	10444	1	4	1	3.12773e-08	0.000176854
B2	100	10445.7	4	1	1	0	0
B2	101	10476.7	0	1	9	0	0
A1	102	10480.2	1	2	5	1.02852e-08	-0.000101416
B2	103	10516.7	3	1	3	0	0
A1	104	10520.9	1	3	3	5.57593e-08	-0.000236134
A1	105	10553.5	2	3	1	1.57137e-07	-0.000396405
A1	106	10567.6	2	2	3	2.53598e-07	-0.000503585
B2	107	10574.2	0	1	9	0	0
A1	108	10594	2	3	1	1.30137e-05	0.00360745
B2	109	10603	3	2	1	0	0
B2	110	10638.2	2	1	5	0	0
A1	111	10652.9	2	2	3	3.3368e-05	-0.0057765
A1	112	10739.5	1	1	7	2.56539e-05	0.00506497
A1	113	10924.6	0	6	0	2.97646e-10	-1.72524e-05
B2	114	10924.6	0	6	0	0	0
A1	115	11081.7	5	0	2	1.25894e-08	-0.000112202
B2	116	11081.7	5	0	2	0	0
A1	117	11206.5	0	4	4	3.88249e-08	-0.00019704
B2	118	11207.2	0	4	4	0	0
A1	119	11248.1	1	5	0	7.91241e-13	8.89517e-07
B2	120	11248.2	1	5	0	0	0
A1	121	11257.8	1	0	10	7.13244e-08	0.000267066
B2	122	11291.8	0	3	6	0	0
A1	123	11323.9	0	3	6	1.36207e-08	0.000116708
A1	124	11342.5	1	4	2	9.63773e-08	-0.000310447
B2	125	11346.7	4	1	2	0	0
A1	126	11377.1	1	2	6	1.11826e-06	-0.00105748
B2	127	11382.2	0	1	10	0	0
A1	128	11422.6	2	4	0	4.97701e-06	0.00223092
B2	129	11423.7	3	1	4	0	0
A1	130	11431	2	4	0	2.60703e-06	0.00161463
B2	131	11446.9	4	2	0	0	0
A1	132	11461.7	2	3	2	2.31059e-08	-0.000152006
A1	133	11482.8	2	2	4	7.5299e-07	0.00086775
B2	134	11483.4	0	1	10	0	0
A1	135	11504.2	2	3	2	9.0694e-06	-0.00301155
B2	136	11515.7	3	2	2	0	0
A1	137	11527.6	3	3	0	1.14441e-06	-0.00106977
B2	138	11563.2	2	1	6	0	0
A1	139	11577.3	2	2	4	5.75158e-06	0.00239825
A1	140	11671.8	1	1	8	2.06092e-07	0.000453974
A1	141	11814.5	0	6	1	2.85399e-10	-1.68937e-05
B2	142	11814.5	0	6	1	0	0
B2	143	11973.3	5	0	3	0	0
A1	144	11973.3	5	0	3	4.35478e-09	6.59908e-05
A1	145	12095	0	4	5	1.04331e-07	0.000323003
B2	146	12097.3	0	4	5	0	0
A1	147	12136.2	1	0	11	3.21973e-09	5.67427e-05
A1	148	12140.6	1	5	1	3.04856e-10	1.74601e-05
B2	149	12140.6	1	5	1	0	0
B2	150	12180.8	0	2	9	0	0
A1	151	12212.8	0	3	7	3.60948e-07	0.00060079
A1	152	12231.3	1	4	3	7.32281e-09	-8.55734e-05
B2	153	12238.6	4	1	3	0	0
A1	154	12267.7	1	4	3	2.07496e-07	-0.000455518
B2	155	12278.1	0	1	11	0	0
A1	156	12311.1	2	4	1	8.61761e-07	0.000928311
B2	157	12323.6	3	1	5	0	0
A1	158	12326.4	2	4	1	1.29569e-06	-0.00113829
B2	159	12341.9	4	2	1	0	0
A1	160	12362.3	1	1	9	2.03915e-07	0.00045157
B2	161	12383.1	0	1	11	0	0
A1	162	12391.9	2	2	5	1.05104e-07	-0.000324197
A1	163	12402.5	3	3	1	1.5494e-08	-0.000124475
B2	164	12422.5	3	2	3	0	0
A1	165	12429.6	3	3	1	2.67862e-08	0.000163665
B2	166	12479.8	2	1	7	0	0
A1	167	12493	2	2	5	2.2806e-06	-0.00151016
A1	168	12510.8	0	7	0	6.70394e-11	8.18776e-06
B2	169	12510.8	0	7	0	0	0
A1	170	12595	1	1	9	5.86349e-06	0.00242146
A1	171	12696.2	0	6	2	7.06548e-12	-2.6581e-06
B2	172	12696.2	0	6	2	0	0
B2	173	12856.2	5	0	4	0	0
A1	174	12856.2	5	0	4	4.64242e-10	2.15463e-05
A1	175	12893.1	1	6	0	5.77459e-12	2.40304e-06
B2	176	12893.2	1	6	0	0	0
A1	177	12970.9	0	4	6	1.38929e-08	0.000117868
B2	178	12977.4	0	4	6	0	0
A1	179	13006.4	0	4	6	2.85269e-08	0.000168899
A1	180	13023.7	1	5	2	4.49732e-10	2.12069e-05
B2	181	13023.9	1	5	2	0	0
B2	182	13060.5	0	2	10	0	0
A1	183	13088.4	1	3	6	5.6624e-08	-0.000237958
A1	184	13111.8	1	4	4	9.20536e-08	-0.000303403
B2	185	13121.7	4	1	4	0	0
A1	186	13141	5	2	0	2.26052e-09	4.7545e-05
B2	187	13146.8	2	5	0	0	0
A1	188	13151.2	1	4	4	7.89097e-08	-0.000280909
B2	189	13163.9	0	1	12	0	0
A1	190	13190.3	2	3	4	3.38851e-08	-0.000184079
A1	191	13211.3	2	4	2	8.2989e-08	-0.000288078
B2	192	13215.2	2	1	8	0	0
B2	193	13230.6	4	2	2	0	0
A1	194	13250.5	4	3	0	7.08482e-09	8.41714e-05
A1	195	13259.8	4	3	0	2.4771e-08	-0.000157388
B2	196	13273.2	0	1	12	0	0
A1	197	13290.1	3	3	2	1.31124e-06	-0.00114509
A1	198	13293.9	1	3	6	1.33775e-08	-0.000115661
B2	199	13320	3	2	4	0	0
B2	200	13326.2	3	4	0	0	0
A1	201	13326.4	3	3	2	1.27527e-06	-0.00112928
A1	202	13381.4	0	7	1	9.13255e-10	3.02201e-05
B2	203	13381.4	0	7	1	0	0
B2	204	13387.5	2	1	8	0	0
A1	205	13399.4	2	2	6	3.31215e-06	-0.00181993
A1	206	13508.7	1	1	10	6.92031e-07	0.000831884
A1	207	13569.7	0	6	3	3.15535e-11	-5.61725e-06
B2	208	13569.7	0	6	3	0	0
A1	209	13730.2	5	0	5	6.45878e-09	8.03665e-05
B2	210	13730.2	5	0	5	0	0
A1	211	13766.6	1	6	1	7.26456e-12	-2.69528e-06
B2	212	13766.6	1	6	1	0	0
A1	213	13831.5	0	4	7	8.95578e-09	-9.4635e-05
B2	214	13847.1	0	4	7	0	0
A1	215	13869.8	0	4	7	1.09555e-08	-0.000104668
A1	216	13897.6	1	5	3	2.73693e-11	5.23157e-06
B2	217	13898.2	1	5	3	0	0
B2	218	13930.4	0	2	11	0	0
A1	219	13951.5	1	3	7	1.61366e-08	0.00012703
A1	220	13983.1	0	3	9	7.20379e-09	8.48751e-05
B2	221	13995.8	4	1	5	0	0
A1	222	14013.5	5	2	1	1.35562e-08	0.000116431
B2	223	14021.8	2	5	1	0	0
A1	224	14026.3	1	4	5	1.34662e-07	0.000366963
A1	225	14032.3	0	8	0	6.93818e-11	8.32958e-06
B2	226	14032.3	0	8	0	0	0
B2	227	14039.1	0	1	13	0	0
A1	228	14062.9	2	3	5	1.55012e-07	-0.000393715
A1	229	14085.2	2	4	3	4.1765e-07	0.000646258
B2	230	14097.1	4	2	3	0	0
B2	231	14113.8	4	2	3	0	0
A1	232	14128	4	3	1	6.30442e-08	0.000251086
A1	233	14144.6	4	3	1	2.44233e-09	4.942e-05
B2	234	14153.3	0	1	13	0	0
A1	235	14169.3	3	3	3	4.88232e-07	0.000698736
A1	236	14186.7	2	2	7	6.42408e-08	0.000253458
B2	237	14200.8	3	4	1	0	0
A1	238	14215.2	3	3	3	2.42519e-07	0.000492462
B2	239	14215.2	3	2	5	0	0
A1	240	14244.3	0	7	2	3.78523e-10	1.94557e-05
B2	241	14244.3	0	7	2	0	0
B2	242	14285.9	2	1	9	0	0
A1	243	14296.2	2	2	7	8.62731e-09	9.28833e-05
A1	244	14412.3	1	2	9	5.5953e-07	0.000748018
B2	245	14435	0	6	4	0	0
A1	246	14435	0	6	4	1.8855e-10	-1.37313e-05
A1	247	14471.1	7	1	0	2.42362e-12	-1.5568e-06
B2	248	14471.2	7	1	0	0	0
A1	249	14594.9	5	0	6	4.85263e-09	-6.96608e-05
B2	250	14594.9	5	0	6	0	0
B2	251	14631.2	1	6	2	0	0
A1	252	14631.2	1	6	2	1.22455e-13	3.49936e-07
A1	253	14676.1	1	0	14	6.01784e-09	-7.75747e-05
B2	254	14706	0	4	8	0	0
A1	255	14725.9	0	4	8	4.11513e-09	-6.41492e-05
A1	256	14761.8	1	5	4	5.12253e-10	-2.2633e-05
B2	257	14763.3	1	5	4	0	0
A1	258	14780.7	6	2	0	5.01349e-12	-2.23908e-06
B2	259	14781.9	2	6	0	0	0
B2	260	14790.2	0	2	12	0	0
A1	261	14803.7	0	0	16	1.58092e-08	0.000125735
A1	262	14843.8	0	3	10	3.9899e-09	6.31657e-05
B2	263	14861.1	4	1	6	0	0
A1	264	14874.3	5	2	2	1.36386e-12	-1.16785e-06
B2	265	14883.6	0	8	1	0	0
A1	266	14883.6	0	8	1	1.56418e-10	1.25067e-05
B2	267	14888	2	5	2	0	0
A1	268	14891.3	5	2	2	4.13612e-10	2.03374e-05
B2	269	14903.6	0	1	14	0	0
A1	270	14929.2	1	4	6	2.02708e-08	0.000142375
A1	271	14938.8	4	4	0	1.70007e-11	4.12319e-06
A1	272	14948.6	2	4	4	3.14105e-08	0.00017723
B2	273	14969.1	4	2	4	0	0
B2	274	14988.5	5	3	0	0	0
B2	275	14991.6	5	3	0	0	0
A1	276	14997.9	4	3	2	3.45797e-08	-0.000185956
A1	277	15020.4	4	3	2	4.39803e-08	-0.000209715
B2	278	15022.8	0	1	14	0	0
A1	279	15039.5	3	3	4	2.16948e-08	0.000147291
A1	280	15071	2	2	8	9.24538e-10	-3.04062e-05
B2	281	15072.7	3	4	2	0	0
A1	282	15091.4	4	4	0	5.94376e-08	0.000243798
A1	283	15096.9	4	4	0	8.78254e-08	0.000296353
B2	284	15097.6	3	2	6	0	0
A1	285	15099.6	0	7	3	8.58554e-11	9.26582e-06
B2	286	15099.7	0	7	3	0	0
B2	287	15174.7	2	1	10	0	0
A1	288	15182.7	2	3	6	6.85433e-07	0.000827909
A1	289	15292	0	6	5	4.59656e-11	6.7798e-06
B2	290	15292	0	6	5	0	0
A1	291	15305.4	1	2	10	4.49519e-07	0.000670462
A1	292	15324.9	7	1	1	1.97766e-11	-4.44709e-06
B2	293	15324.9	7	1	1	0	0
A1	294	15449.8	5	0	7	2.64493e-10	1.62632e-05
B2	295	15450.1	5	0	7	0	0
B2	296	15487.1	1	6	3	0	0
A1	297	15487.1	1	6	3	8.70217e-12	-2.94994e-06
B2	298	15490.3	9	0	0	0	0
A1	299	15490.3	9	0	0	7.26551e-13	-8.5238e-07
A1	300	15506.6	1	0	15	5.30067e-10	-2.30232e-05
B2	301	15553.7	0	3	11	0	0
A1	302	15572.4	0	4	9	1.15319e-08	-0.000107387
A1	303	15615.4	1	5	5	9.29473e-10	3.04873e-05
B2	304	15618.9	1	5	5	0	0
A1	305	15635.8	6	2	1	1.52801e-11	-3.90898e-06
B2	306	15637.3	2	6	1	0	0
B2	307	15639.6	0	2	13	0	0
A1	308	15646.5	0	0	17	3.909e-11	-6.2522e-06
A1	309	15693.2	2	4	5	8.65125e-10	2.9413e-05
B2	310	15717.2	3	1	9	0	0
A1	311	15724.8	5	2	3	7.80861e-09	-8.83663e-05
B2	312	15728.2	0	8	2	0	0
A1	313	15728.3	0	8	2	2.38772e-13	4.88643e-07
A1	314	15745.2	5	2	3	4.68553e-08	-0.000216461
B2	315	15745.6	2	5	3	0	0
B2	316	15757.1	0	1	15	0	0
A1	317	15787.8	1	4	7	9.13617e-09	9.55833e-05
A1	318	15796.3	4	4	1	2.33949e-09	4.83682e-05
A1	319	15802.7	4	3	3	2.37753e-08	-0.000154192
B2	320	15831.2	4	2	5	0	0
B2	321	15847.8	5	3	1	0	0
A1	322	15858.9	4	3	3	2.20058e-09	-4.69104e-05
B2	323	15860.9	4	1	7	0	0
B2	324	15881.4	0	1	15	0	0
A1	325	15884.4	4	3	3	6.80473e-08	-0.000260859
A1	326	15902.7	3	3	5	1.23843e-07	0.000351914
B2	327	15937.3	3	4	3	0	0
A1	328	15945.7	2	2	9	1.51048e-08	-0.000122901
B2	329	15947.8	0	7	4	0	0
A1	330	15948.3	0	7	4	3.3791e-09	-5.813e-05
A1	331	15951.6	4	4	1	3.44287e-08	0.00018555
A1	332	15966.5	3	3	5	1.48253e-07	-0.000385036
B2	333	15970.9	3	2	7	0	0
A1	334	15983.1	8	1	0	2.76198e-14	1.66192e-07
B2	335	15983.1	8	1	0	0	0
B2	336	16053.4	2	1	11	0	0
A1	337	16058.7	2	3	7	1.42534e-07	-0.000377537
A1	338	16141.1	0	6	6	6.65059e-10	-2.57887e-05
B2	339	16141.1	0	6	6	0	0
A1	340	16170.4	7	1	2	1.59983e-11	-3.99979e-06
B2	341	16170.4	7	1	2	0	0
A1	342	16187.7	1	2	11	9.15662e-09	9.56903e-05
A1	343	16294.6	5	0	8	4.61416e-10	2.14806e-05
B2	344	16296	5	0	8	0	0
A1	345	16323.1	9	0	1	2.74631e-11	5.24052e-06
B2	346	16323.1	9	0	1	0	0
A1	347	16324.4	0	0	18	2.18413e-09	4.67347e-05
A1	348	16335.4	1	6	4	3.17426e-12	-1.78164e-06
B2	349	16335.4	1	6	4	0	0
A1	350	16349.6	2	7	0	6.0086e-13	7.75152e-07
B2	351	16349.9	7	2	0	0	0
B2	352	16390.9	0	3	12	0	0
A1	353	16408.2	0	0	18	9.26196e-10	3.04335e-05
A1	354	16457.8	1	5	6	5.22574e-11	-7.22893e-06
B2	355	16464.6	1	5	6	0	0
B2	356	16480.4	0	4	10	0	0
A1	357	16480.5	6	2	2	6.85206e-10	2.61764e-05
A1	358	16482.9	6	2	2	2.11782e-09	4.60198e-05
B2	359	16483.7	2	6	2	0	0
A1	360	16532.9	2	4	6	2.00199e-13	4.47436e-07
B2	361	16564.6	3	1	10	0	0
A1	362	16564.9	3	6	0	9.29403e-10	-3.04861e-05
A1	363	16568.9	0	8	3	1.96604e-10	-1.40216e-05
B2	364	16569.1	0	8	3	0	0
A1	365	16569.8	3	6	0	6.37888e-10	2.52564e-05
A1	366	16589.2	1	1	14	1.65254e-08	-0.000128551
B2	367	16595.1	2	5	4	0	0
B2	368	16597.9	6	3	0	0	0
B2	369	16601.7	0	1	16	0	0
A1	370	16636.9	1	4	8	1.86463e-08	-0.000136552
A1	371	16644.4	4	4	2	5.1103e-09	-7.14864e-05
A1	372	16653	4	3	4	1.85652e-09	-4.30874e-05
B2	373	16684	4	2	6	0	0
B2	374	16700.1	5	3	2	0	0
A1	375	16708	4	5	0	8.81274e-09	-9.38762e-05
A1	376	16713.2	4	5	0	1.02815e-08	0.000101398
B2	377	16723	4	1	8	0	0
B2	378	16730.6	3	2	8	0	0
A1	379	16735.6	4	3	4	6.03266e-10	2.45615e-05
A1	380	16761.1	3	3	6	1.58892e-08	0.000126052
A1	381	16793	0	7	5	9.96666e-13	-9.98332e-07
B2	382	16793	0	7	5	0	0
B2	383	16794.5	3	4	4	0	0
A1	384	16804	4	4	2	5.83453e-11	7.63841e-06
A1	385	16813.1	2	2	10	5.3142e-09	-7.28985e-05
A1	386	16817.2	8	1	1	2.64421e-11	5.14219e-06
B2	387	16817.2	8	1	1	0	0
A1	388	16827.7	3	3	6	6.74381e-10	2.59688e-05
B2	389	16828.3	5	4	0	0	0
B2	390	16835.5	3	2	8	0	0
A1	391	16885.8	10	0	0	1.75445e-14	-1.32456e-07
B2	392	16885.8	10	0	0	0	0
B2	393	16922.9	2	1	12	0	0
A1	394	16925.1	2	3	8	6.7511e-08	-0.000259829
A1	395	16986.4	0	6	7	3.67811e-10	-1.91784e-05
B2	396	16986.5	0	6	7	0	0
B2	397	17009.4	7	1	3	0	0
A1	398	17009.4	7	1	3	2.13645e-11	4.62218e-06
A1	399	17059.4	1	2	12	1.24195e-07	-0.000352413
A1	400	17136.7	5	0	9	1.04035e-09	3.22545e-05
B2	401	17138.7	5	0	9	0	0
A1	402	17152.1	9	0	2	4.11751e-11	-6.41678e-06
B2	403	17152.1	9	0	2	0	0
A1	404	17161.5	0	0	19	1.52888e-12	-1.23648e-06
A1	405	17176.8	1	6	5	7.11117e-11	8.43278e-06
B2	406	17176.9	1	6	5	0	0
A1	407	17185.2	2	7	1	1.16826e-12	-1.08086e-06
B2	408	17185.5	7	2	1	0	0
B2	409	17232.4	0	3	13	0	0
A1	410	17247.3	0	0	19	2.75022e-09	5.24425e-05
A1	411	17293.4	1	5	7	2.26652e-10	1.5055e-05
B2	412	17304.4	1	5	7	0	0
A1	413	17317.3	6	2	3	5.60594e-12	-2.36769e-06
B2	414	17320.8	2	6	3	0	0
B2	415	17322.6	2	6	3	0	0
A1	416	17324.2	6	2	3	5.7904e-11	7.60947e-06
A1	417	17372.6	1	5	7	5.32225e-10	2.307e-05
A1	418	17398.5	3	6	1	2.33042e-14	1.52657e-07
B2	419	17405.3	0	8	4	0	0
A1	420	17405.6	0	8	4	4.14732e-12	-2.0365e-06
A1	421	17406.6	3	6	1	1.09896e-10	-1.04831e-05
B2	422	17409.6	3	1	11	0	0
B2	423	17430.6	9	1	0	0	0
A1	424	17430.6	9	1	0	1.21626e-10	-1.10284e-05
A1	425	17431.1	1	1	15	4.45967e-09	-6.67808e-05
B2	426	17435.1	6	3	1	0	0
B2	427	17439.1	2	5	5	0	0
B2	428	17444	0	1	17	0	0
A1	429	17484.1	4	3	5	6.75905e-12	-2.59982e-06
A1	430	17486.8	4	4	3	7.53822e-10	-2.74558e-05
A1	431	17502.9	4	3	5	9.9869e-10	3.1602e-05
B2	432	17531.4	5	3	3	0	0
B2	433	17547.5	5	3	3	0	0
A1	434	17548.4	4	5	1	3.1976e-11	-5.65474e-06
A1	435	17561.2	4	5	1	3.78488e-09	6.15214e-05
B2	436	17575.6	2	1	13	0	0
B2	437	17582.3	3	2	9	0	0
A1	438	17583.5	4	3	5	2.40796e-08	0.000155176
A1	439	17617.9	3	3	7	2.60682e-09	5.10571e-05
A1	440	17634.9	0	7	6	1.77174e-10	1.33107e-05
B2	441	17635	0	7	6	0	0
A1	442	17644.6	8	1	2	1.19348e-11	3.45468e-06
B2	443	17644.6	8	1	2	0	0
B2	444	17645.4	3	4	5	0	0
A1	445	17651.1	4	4	3	8.25381e-09	-9.08505e-05
B2	446	17670.3	5	4	1	0	0
A1	447	17678.1	2	2	11	6.84695e-10	2.61667e-05
A1	448	17686.8	3	3	7	4.69687e-08	0.000216723
B2	449	17696	3	2	9	0	0
A1	450	17707.4	10	0	1	1.09691e-12	-1.04734e-06
B2	451	17707.4	10	0	1	0	0
B2	452	17792.8	3	1	11	0	0
A1	453	17794.5	2	4	9	8.56365e-08	0.000292637
B2	454	17830	0	6	8	0	0
A1	455	17830	0	6	8	1.11265e-11	-3.33564e-06
B2	456	17841.4	7	1	4	0	0
A1	457	17841.4	7	1	4	1.1553e-11	3.39898e-06
A1	458	17851.4	2	8	0	1.8382e-14	-1.3558e-07
B2	459	17851.5	8	2	0	0	0
A1	460	17937.3	1	3	13	5.47553e-09	-7.39968e-05
A1	461	17966.2	0	0	20	5.19496e-10	2.27924e-05
B2	462	17978.5	5	0	10	0	0
A1	463	17987.4	5	0	10	2.55453e-10	-1.59829e-05
B2	464	17988.6	9	0	3	0	0
A1	465	17988.7	9	0	3	2.1864e-13	4.6759e-07
A1	466	18010.4	1	6	6	1.01301e-10	-1.00648e-05
B2	467	18010.8	1	6	6	0	0
A1	468	18012.4	2	7	2	6.40862e-12	-2.53153e-06
B2	469	18012.7	7	2	2	0	0
B2	470	18069.4	0	2	16	0	0
A1	471	18083.8	0	0	20	1.65652e-09	-4.07004e-05
A1	472	18123.2	5	2	6	7.78752e-10	2.79061e-05
A1	473	18135.4	3	7	0	2.79412e-12	1.67156e-06
B2	474	18140.2	2	5	6	0	0
A1	475	18146.1	6	2	4	3.68435e-11	-6.06988e-06
B2	476	18147.6	7	3	0	0	0
B2	477	18152.4	2	6	4	0	0
A1	478	18169.7	0	0	20	2.15145e-10	-1.46678e-05
B2	479	18173	0	1	18	0	0
A1	480	18208.7	1	5	8	1.19366e-10	-1.09255e-05
A1	481	18224.4	3	6	2	5.82258e-11	7.63058e-06
B2	482	18230.3	0	11	0	0	0
A1	483	18230.3	0	11	0	1.9582e-13	4.42515e-07
A1	484	18237.1	3	6	2	1.0593e-10	-1.02922e-05
B2	485	18251.1	9	1	1	0	0
A1	486	18251.1	9	1	1	1.44267e-12	1.20111e-06
B2	487	18258.8	0	8	5	0	0
A1	488	18259.5	0	8	5	2.32679e-11	4.82368e-06
B2	489	18260.1	0	8	5	0	0
B2	490	18265.1	6	3	2	0	0
B2	491	18279.4	2	5	6	0	0
A1	492	18283.5	5	5	0	7.10986e-11	-8.432e-06
A1	493	18292.2	1	1	16	5.90157e-09	7.68217e-05
B2	494	18303	0	1	18	0	0
A1	495	18322.6	4	4	4	4.4123e-09	6.64252e-05
A1	496	18330.7	5	2	6	1.62341e-10	1.27413e-05
A1	497	18356.1	4	3	6	1.49587e-10	1.22306e-05
B2	498	18375.3	5	3	4	0	0
A1	499	18382.2	4	5	2	6.52442e-10	2.55429e-05
B2	500	18386.7	4	6	0	0	0
B2	501	18398.8	5	3	4	0	0
A1	502	18416.3	4	3	6	5.31217e-09	-7.28846e-05
B2	503	18445.6	2	1	14	0	0
A1	504	18447.1	2	2	12	2.74344e-09	-5.23779e-05
B2	505	18447.2	3	2	10	0	0
A1	506	18474.5	8	1	3	1.92731e-10	-1.38828e-05
B2	507	18474.7	8	1	3	0	0
A1	508	18478.8	3	3	8	7.74755e-09	-8.80202e-05
A1	509	18494.9	4	4	4	1.67013e-09	-4.08672e-05
B2	510	18497.6	3	4	6	0	0
B2	511	18508.6	5	4	2	0	0
A1	512	18517.9	0	7	7	8.69138e-11	9.32276e-06
B2	513	18517.9	0	7	7	0	0
A1	514	18530.5	5	5	0	1.321e-11	-3.63456e-06
A1	515	18546.1	3	3	8	1.0684e-08	-0.000103363
A1	516	18556.6	2	2	12	1.71908e-09	-4.14618e-05
A1	517	18559.2	10	0	2	7.17152e-12	2.67797e-06
B2	518	18559.2	10	0	2	0	0
B2	519	18566.4	3	2	10	0	0
A1	520	18667.5	2	4	10	2.34945e-10	-1.53279e-05
A1	521	18669.2	2	8	1	4.00618e-13	6.32944e-07
B2	522	18669.3	8	2	1	0	0
B2	523	18678.8	2	1	14	0	0
B2	524	18691	7	1	5	0	0
A1	525	18691	7	1	5	3.66524e-14	1.91448e-07
B2	526	18758.7	0	6	9	0	0
A1	527	18758.8	0	6	9	2.70702e-10	-1.6453e-05
A1	528	18825.3	10	1	0	3.94501e-12	1.98621e-06
B2	529	18825.3	10	1	0	0	0
A1	530	18825.7	1	3	14	3.24607e-08	-0.000180168
A1	531	18839.1	2	7	3	3.13256e-12	-1.7699e-06
B2	532	18839.7	7	2	3	0	0
A1	533	18860.8	9	0	4	8.17087e-12	2.85847e-06
B2	534	18860.9	9	0	4	0	0
A1	535	18890.9	1	6	7	4.5019e-11	6.70962e-06
B2	536	18892.2	1	6	7	0	0
A1	537	18951.6	3	7	1	2.40457e-14	-1.55067e-07
A1	538	18962.6	5	0	11	1.58861e-10	-1.2604e-05
B2	539	18963.4	5	0	11	0	0
B2	540	18965.7	7	3	1	0	0
A1	541	18987.2	3	6	3	4.65768e-11	6.82472e-06
A1	542	18987.7	0	0	21	1.75449e-10	-1.32457e-05
B2	543	19002.4	2	6	5	0	0
A1	544	19052.1	4	4	5	2.28348e-10	1.51112e-05
A1	545	19055.8	3	6	3	1.21934e-11	3.4919e-06
B2	546	19056.2	2	5	7	0	0
B2	547	19067.1	0	1	19	0	0
B2	548	19073.9	9	1	2	0	0
A1	549	19074.1	9	1	2	9.32366e-12	-3.05347e-06
A1	550	19092	0	3	15	5.85544e-11	7.65209e-06
B2	551	19096.7	6	3	3	0	0
A1	552	19098.3	0	11	1	3.09072e-12	1.75804e-06
B2	553	19098.6	0	11	1	0	0
A1	554	19101.9	5	5	1	3.48889e-11	-5.90668e-06
A1	555	19112.6	5	5	1	8.43596e-11	9.18475e-06
B2	556	19132.8	0	4	13	0	0
B2	557	19142.4	0	8	6	0	0
A1	558	19143.6	0	8	6	2.53251e-11	5.03241e-06
A1	559	19152.4	4	5	3	2.01798e-11	-4.4922e-06
B2	560	19163.1	5	3	5	0	0
B2	561	19182.2	4	2	9	0	0
A1	562	19196.2	4	5	3	2.65965e-11	-5.15718e-06
A1	563	19203.9	2	0	17	3.63231e-10	1.90586e-05
B2	564	19208.2	4	6	1	0	0
A1	565	19223.4	4	3	7	8.82684e-11	-9.39512e-06
A1	566	19231	4	5	3	4.31097e-10	-2.07629e-05
B2	567	19237.8	5	3	5	0	0
B2	568	19264.2	2	5	7	0	0
A1	569	19273.2	1	3	13	5.35262e-10	2.31357e-05
A1	570	19298.7	9	2	0	2.369e-13	-4.86724e-07
B2	571	19298.8	9	2	0	0	0
A1	572	19305.4	4	4	5	1.09843e-09	3.31425e-05
B2	573	19314.1	2	1	15	0	0
A1	574	19326.3	8	1	4	2.31094e-11	4.80722e-06
B2	575	19326.9	8	1	4	0	0
A1	576	19332	3	3	9	1.00761e-09	-3.17428e-05
B2	577	19335.2	5	4	3	0	0
A1	578	19350.8	5	5	1	9.25655e-11	9.6211e-06
B2	579	19353.3	3	4	7	0	0
A1	580	19356.7	5	5	1	6.66749e-11	8.16547e-06
B2	581	19385.9	3	2	11	0	0
A1	582	19409	3	3	9	2.45555e-09	-4.95535e-05
B2	583	19419.2	0	7	8	0	0
A1	584	19422.7	0	7	8	4.8075e-10	-2.1926e-05
B2	585	19429.8	4	2	9	0	0
A1	586	19441.5	1	0	19	9.4153e-10	3.06844e-05
B2	587	19489.8	8	2	2	0	0
A1	588	19489.8	2	8	2	1.0941e-12	1.04599e-06
A1	589	19526.5	2	2	13	1.05856e-11	-3.25355e-06
B2	590	19546.5	0	12	0	0	0
A1	591	19546.5	0	12	0	1.5914e-11	-3.98923e-06
B2	592	19552.3	0	12	0	0	0
A1	593	19552.3	0	12	0	1.45182e-11	3.81027e-06
B2	594	19553.4	0	2	17	0	0
A1	595	19562.7	7	1	6	1.20327e-10	1.09694e-05
B2	596	19564	7	1	6	0	0
A1	597	19581.5	1	0	19	6.41551e-09	-8.00969e-05
A1	598	19645.1	3	8	0	9.60859e-15	9.80234e-08
B2	599	19647.8	8	3	0	0	0
A1	600	19675.2	10	1	1	2.09639e-11	4.57863e-06
B2	601	19675.6	10	1	1	0	0
A1	602	19677.8	10	1	1	9.25491e-12	3.04219e-06
B2	603	19678.2	7	2	4	0	0
A1	604	19679.1	0	6	10	6.18839e-11	-7.86663e-06
B2	605	19680.7	0	6	10	0	0
B2	606	19708.4	3	1	13	0	0
A1	607	19749.2	2	4	11	2.7955e-08	0.000167197
A1	608	19762.8	3	7	2	5.65669e-15	7.52109e-08
B2	609	19779.3	2	6	6	0	0
B2	610	19782.2	7	3	2	0	0
A1	611	19784	6	2	6	2.88674e-10	1.69904e-05
A1	612	19829.5	5	6	0	3.5426e-12	1.88218e-06
A1	613	19832.4	3	6	4	1.08983e-11	3.30126e-06
B2	614	19865.5	6	3	4	0	0
A1	615	19876.7	0	0	22	1.28319e-09	3.58216e-05
B2	616	19892.2	0	4	12	0	0
A1	617	19895	0	4	12	2.50341e-10	1.58222e-05
A1	618	19899.3	5	5	2	8.08797e-14	-2.84394e-07
B2	619	19903.5	7	4	0	0	0
A1	620	19930.5	5	5	2	4.50135e-14	-2.12164e-07
B2	621	19939.1	6	3	4	0	0
A1	622	19941.3	1	3	15	1.78946e-09	4.2302e-05
A1	623	19948.4	4	4	6	1.40657e-12	1.18599e-06
B2	624	19966.3	2	5	8	0	0
B2	625	19967.4	0	1	20	0	0
B2	626	19975.4	0	11	2	0	0
A1	627	19975.5	0	11	2	1.63541e-11	4.04401e-06

## Sheet: GM
Gamma	NN	E-ZPE, cm-1	v1	v2	v3	Density
A1	1	0	0	0	0	0.161621
A1	2	998.608	0	0	1	0.374292
A1	3	1978.35	0	0	2	0.30349
B2	4	1993	0	1	0	0
A1	5	2005.54	1	0	0	0.0877649
A1	6	2951.68	0	0	3	0.00210363
B2	7	2974.73	0	1	1	0
A1	8	2998.78	1	0	1	0.0048261
A1	9	3907.79	2	0	0	0.0035826
B2	10	3913.39	0	2	0	0
A1	11	3923.64	2	0	0	0.000100075
B2	12	3952.47	0	1	2	0
A1	13	3975.99	1	1	0	0.000277782
A1	14	3996.33	1	1	0	0.000157456
A1	15	4861.11	1	0	3	3.3704e-08
B2	16	4873.17	0	2	1	0
A1	17	4889.76	2	0	1	2.55375e-05
B2	18	4924.73	0	1	3	0
A1	19	4941.7	1	1	1	4.97886e-06
A1	20	4978.54	1	0	3	1.23217e-06
A1	21	5768.07	0	3	0	1.94973e-06
B2	22	5768.23	0	3	0	0
A1	23	5805.81	1	0	4	5.01698e-09
B2	24	5825.27	0	2	2	0
A1	25	5848.65	2	0	2	3.41004e-07
A1	26	5888.69	1	1	2	5.29199e-08
B2	27	5889.45	0	1	4	0
B2	28	5911.15	2	1	0	0
A1	29	5912.98	1	2	0	3.75398e-08
A1	30	5956.65	1	0	4	2.64956e-08
A1	31	6710.83	0	3	1	2.04614e-09
B2	32	6711.68	0	3	1	0
A1	33	6742.71	1	0	5	8.15457e-09
B2	34	6770.28	0	2	3	0
A1	35	6799.86	2	0	3	9.44113e-11
A1	36	6830.3	1	1	3	1.2255e-09
B2	37	6843.9	0	1	5	0
B2	38	6865.35	2	1	1	0
A1	39	6871.13	1	2	1	3.24429e-10
A1	40	6927.95	1	0	5	0.0117391
A1	41	7554.39	0	4	0	0.0244016
B2	42	7554.39	0	4	0	0
A1	43	7642.6	0	3	2	0.0178669
B2	44	7645.71	0	3	2	0
A1	45	7672.75	1	0	6	0.00476973
B2	46	7708.28	0	2	4	0
A1	47	7740.73	2	0	4	0.000132335
A1	48	7749.7	1	3	0	0.000176431
B2	49	7754.76	3	1	0	0
A1	50	7770.5	1	1	4	0.000135937
B2	51	7788.84	0	1	6	0
A1	52	7813.91	2	2	0	5.88014e-06
B2	53	7817.65	2	1	2	0
A1	54	7834.51	2	2	0	6.17869e-06
A1	55	7892.36	1	0	6	4.3978e-06
A1	56	8481.19	0	4	1	4.21328e-08
B2	57	8481.2	0	4	1	0
A1	58	8562.82	0	3	3	3.89624e-07
B2	59	8570.64	0	3	3	0
A1	60	8596.63	0	3	3	1.32044e-07
B2	61	8639.02	0	2	5	0
A1	62	8664.62	1	2	3	3.41008e-09
A1	63	8681.32	2	0	5	2.48476e-08
B2	64	8682.62	3	1	1	0
A1	65	8706.39	1	1	5	2.06094e-09
B2	66	8725.99	0	1	7	0
A1	67	8745.08	2	2	1	1.66907e-09
B2	68	8764.63	2	1	3	0
A1	69	8780.1	2	2	1	1.13446e-09
A1	70	8849.34	1	0	7	1.12484e-11
A1	71	9272.79	5	0	0	2.21404e-10
B2	72	9272.79	5	0	0	0
A1	73	9398.89	0	4	2	1.65704e-11
B2	74	9398.94	0	4	2	0
A1	75	9471.66	0	3	4	2.01864e-11
B2	76	9486.61	0	3	4	0
A1	77	9513.96	0	3	4	1.05926e-11
A1	78	9534.71	1	4	0	0.000389056
B2	79	9535.43	4	1	0	0
B2	80	9562.04	0	2	6	0
A1	81	9576.55	1	2	4	0.000703352
B2	82	9603.05	3	1	2	0
A1	83	9606.01	2	0	6	0.000452722
A1	84	9635.37	1	1	6	0.00011268
A1	85	9652.17	2	3	0	5.06501e-06
B2	86	9654.85	0	1	8	0
A1	87	9673.52	2	2	2	1.31828e-06
B2	88	9686.16	3	2	0	0
B2	89	9705.21	2	1	4	0
A1	90	9720.36	2	2	2	1.54987e-06
A1	91	9798.51	1	0	8	2.12226e-07
A1	92	10181.6	5	0	1	9.97093e-10
B2	93	10181.6	5	0	1	0
A1	94	10307.5	0	4	3	2.14683e-08
B2	95	10307.7	0	4	3	0
A1	96	10369.8	1	0	9	9.83172e-09
B2	97	10393.7	0	3	5	0
A1	98	10423.6	0	3	5	5.76747e-10
A1	99	10444	1	4	1	7.03825e-10
B2	100	10445.7	4	1	1	0
B2	101	10476.7	0	1	9	0
A1	102	10480.2	1	2	5	1.09091e-09
B2	103	10516.7	3	1	3	0
A1	104	10520.9	1	3	3	7.18147e-11
A1	105	10553.5	2	3	1	1.64268e-10
A1	106	10567.6	2	2	3	1.28951e-10
B2	107	10574.2	0	1	9	0
A1	108	10594	2	3	1	2.90927e-12
B2	109	10603	3	2	1	0
B2	110	10638.2	2	1	5	0
A1	111	10652.9	2	2	3	4.1586e-11
A1	112	10739.5	1	1	7	9.56792e-13
A1	113	10924.6	0	6	0	5.17793e-12
B2	114	10924.6	0	6	0	0
A1	115	11081.7	5	0	2	0.000187522
B2	116	11081.7	5	0	2	0
A1	117	11206.5	0	4	4	0.000331215
B2	118	11207.2	0	4	4	0
A1	119	11248.1	1	5	0	0.000200448
B2	120	11248.2	1	5	0	0
A1	121	11257.8	1	0	10	4.14038e-05
B2	122	11291.8	0	3	6	0
A1	123	11323.9	0	3	6	4.62648e-07
A1	124	11342.5	1	4	2	1.57631e-06
B2	125	11346.7	4	1	2	0
A1	126	11377.1	1	2	6	7.11106e-07
B2	127	11382.2	0	1	10	0
A1	128	11422.6	2	4	0	6.07828e-09
B2	129	11423.7	3	1	4	0
A1	130	11431	2	4	0	3.57138e-08
B2	131	11446.9	4	2	0	0
A1	132	11461.7	2	3	2	9.45124e-09
A1	133	11482.8	2	2	4	2.14597e-10
B2	134	11483.4	0	1	10	0
A1	135	11504.2	2	3	2	8.92812e-10
B2	136	11515.7	3	2	2	0
A1	137	11527.6	3	3	0	1.17829e-11
B2	138	11563.2	2	1	6	0
A1	139	11577.3	2	2	4	5.55294e-11
A1	140	11671.8	1	1	8	2.04156e-12
A1	141	11814.5	0	6	1	7.94071e-12
B2	142	11814.5	0	6	1	0
B2	143	11973.3	5	0	3	0
A1	144	11973.3	5	0	3	3.52343e-13
A1	145	12095	0	4	5	2.34773e-12
B2	146	12097.3	0	4	5	0
A1	147	12136.2	1	0	11	2.84479e-13
A1	148	12140.6	1	5	1	5.00997e-13
B2	149	12140.6	1	5	1	0
B2	150	12180.8	0	2	9	0
A1	151	12212.8	0	3	7	1.81445e-13
A1	152	12231.3	1	4	3	1.24391e-05
B2	153	12238.6	4	1	3	0
A1	154	12267.7	1	4	3	1.81096e-05
B2	155	12278.1	0	1	11	0
A1	156	12311.1	2	4	1	9.43504e-06
B2	157	12323.6	3	1	5	0
A1	158	12326.4	2	4	1	2.18974e-06
B2	159	12341.9	4	2	1	0
A1	160	12362.3	1	1	9	2.4918e-07
B2	161	12383.1	0	1	11	0
A1	162	12391.9	2	2	5	1.50655e-08
A1	163	12402.5	3	3	1	3.68065e-10
B2	164	12422.5	3	2	3	0
A1	165	12429.6	3	3	1	9.06757e-09
B2	166	12479.8	2	1	7	0
A1	167	12493	2	2	5	8.63165e-09
A1	168	12510.8	0	7	0	6.66205e-10
B2	169	12510.8	0	7	0	0
A1	170	12595	1	1	9	9.85669e-10
A1	171	12696.2	0	6	2	1.12967e-09
B2	172	12696.2	0	6	2	0
B2	173	12856.2	5	0	4	0
A1	174	12856.2	5	0	4	1.5765e-11
A1	175	12893.1	1	6	0	2.04965e-10
B2	176	12893.2	1	6	0	0
A1	177	12970.9	0	4	6	8.04482e-11
B2	178	12977.4	0	4	6	0
A1	179	13006.4	0	4	6	8.05363e-12
A1	180	13023.7	1	5	2	2.78781e-11
B2	181	13023.9	1	5	2	0
B2	182	13060.5	0	2	10	0
A1	183	13088.4	1	3	6	1.5201e-13
A1	184	13111.8	1	4	4	3.38913e-12
B2	185	13121.7	4	1	4	0
A1	186	13141	5	2	0	1.19312e-05
B2	187	13146.8	2	5	0	0
A1	188	13151.2	1	4	4	1.69067e-05
B2	189	13163.9	0	1	12	0
A1	190	13190.3	2	3	4	7.7123e-06
A1	191	13211.3	2	4	2	1.03398e-06
B2	192	13215.2	2	1	8	0
B2	193	13230.6	4	2	2	0
A1	194	13250.5	4	3	0	2.38676e-10
A1	195	13259.8	4	3	0	2.97456e-08
B2	196	13273.2	0	1	12	0
A1	197	13290.1	3	3	2	2.62236e-09
A1	198	13293.9	1	3	6	5.59333e-10
B2	199	13320	3	2	4	0
B2	200	13326.2	3	4	0	0
A1	201	13326.4	3	3	2	1.00728e-10
A1	202	13381.4	0	7	1	1.70404e-10
B2	203	13381.4	0	7	1	0
B2	204	13387.5	2	1	8	0
A1	205	13399.4	2	2	6	8.50587e-11
A1	206	13508.7	1	1	10	1.60625e-11
A1	207	13569.7	0	6	3	4.80762e-11
B2	208	13569.7	0	6	3	0
A1	209	13730.2	5	0	5	1.34597e-12
B2	210	13730.2	5	0	5	0
A1	211	13766.6	1	6	1	8.77058e-12
B2	212	13766.6	1	6	1	0
A1	213	13831.5	0	4	7	3.4537e-12
B2	214	13847.1	0	4	7	0
A1	215	13869.8	0	4	7	3.87757e-13
A1	216	13897.6	1	5	3	9.7982e-13
B2	217	13898.2	1	5	3	0
B2	218	13930.4	0	2	11	0
A1	219	13951.5	1	3	7	1.72762e-14
A1	220	13983.1	0	3	9	3.83112e-07
B2	221	13995.8	4	1	5	0
A1	222	14013.5	5	2	1	3.6011e-07
B2	223	14021.8	2	5	1	0
A1	224	14026.3	1	4	5	1.07397e-07
A1	225	14032.3	0	8	0	2.25449e-08
B2	226	14032.3	0	8	0	0
B2	227	14039.1	0	1	13	0
A1	228	14062.9	2	3	5	1.62847e-08
A1	229	14085.2	2	4	3	1.45618e-08
B2	230	14097.1	4	2	3	0
B2	231	14113.8	4	2	3	0
A1	232	14128	4	3	1	2.95679e-09
A1	233	14144.6	4	3	1	4.41563e-10
B2	234	14153.3	0	1	13	0
A1	235	14169.3	3	3	3	1.9049e-09
A1	236	14186.7	2	2	7	3.56306e-10
B2	237	14200.8	3	4	1	0
A1	238	14215.2	3	3	3	7.6221e-11
B2	239	14215.2	3	2	5	0
A1	240	14244.3	0	7	2	1.80831e-10
B2	241	14244.3	0	7	2	0
B2	242	14285.9	2	1	9	0
A1	243	14296.2	2	2	7	1.01313e-11
A1	244	14412.3	1	2	9	1.93236e-11
B2	245	14435	0	6	4	0
A1	246	14435	0	6	4	1.12505e-11
A1	247	14471.1	7	1	0	3.10158e-13
B2	248	14471.2	7	1	0	0
A1	249	14594.9	5	0	6	1.9331e-12
B2	250	14594.9	5	0	6	0
B2	251	14631.2	1	6	2	0
A1	252	14631.2	1	6	2	4.33804e-07
A1	253	14676.1	1	0	14	4.0921e-07
B2	254	14706	0	4	8	0
A1	255	14725.9	0	4	8	8.93919e-08
A1	256	14761.8	1	5	4	6.24906e-10
B2	257	14763.3	1	5	4	0
A1	258	14780.7	6	2	0	1.43695e-09
B2	259	14781.9	2	6	0	0
B2	260	14790.2	0	2	12	0
A1	261	14803.7	0	0	16	3.08379e-11
A1	262	14843.8	0	3	10	9.65956e-10
B2	263	14861.1	4	1	6	0
A1	264	14874.3	5	2	2	2.28735e-10
B2	265	14883.6	0	8	1	0
A1	266	14883.6	0	8	1	4.4704e-11
B2	267	14888	2	5	2	0
A1	268	14891.3	5	2	2	1.17984e-10
B2	269	14903.6	0	1	14	0
A1	270	14929.2	1	4	6	9.60653e-12
A1	271	14938.8	4	4	0	8.78382e-12
A1	272	14948.6	2	4	4	7.96185e-12
B2	273	14969.1	4	2	4	0
B2	274	14988.5	5	3	0	0
B2	275	14991.6	5	3	0	0
A1	276	14997.9	4	3	2	2.79756e-14
A1	277	15020.4	4	3	2	1.09847e-12
B2	278	15022.8	0	1	14	0
A1	279	15039.5	3	3	4	2.20027e-13
A1	280	15071	2	2	8	2.06224e-14
B2	281	15072.7	3	4	2	0
A1	282	15091.4	4	4	0	9.63592e-08
A1	283	15096.9	4	4	0	9.68393e-08
B2	284	15097.6	3	2	6	0
A1	285	15099.6	0	7	3	2.2891e-08
B2	286	15099.7	0	7	3	0
B2	287	15174.7	2	1	10	0
A1	288	15182.7	2	3	6	8.12559e-11
A1	289	15292	0	6	5	1.1391e-09
B2	290	15292	0	6	5	0
A1	291	15305.4	1	2	10	1.76455e-10
A1	292	15324.9	7	1	1	8.44595e-11
B2	293	15324.9	7	1	1	0
A1	294	15449.8	5	0	7	1.16932e-10
B2	295	15450.1	5	0	7	0
B2	296	15487.1	1	6	3	0
A1	297	15487.1	1	6	3	3.42627e-12
B2	298	15490.3	9	0	0	0
A1	299	15490.3	9	0	0	1.40666e-11
A1	300	15506.6	1	0	15	8.56916e-12
B2	301	15553.7	0	3	11	0
A1	302	15572.4	0	4	9	4.18915e-16
A1	303	15615.4	1	5	5	1.69699e-12
B2	304	15618.9	1	5	5	0
A1	305	15635.8	6	2	1	4.52373e-13
B2	306	15637.3	2	6	1	0
B2	307	15639.6	0	2	13	0
A1	308	15646.5	0	0	17	5.40652e-14
A1	309	15693.2	2	4	5	1.38756e-13
B2	310	15717.2	3	1	9	0
A1	311	15724.8	5	2	3	6.61994e-15
B2	312	15728.2	0	8	2	0
A1	313	15728.3	0	8	2	9.15104e-09
A1	314	15745.2	5	2	3	1.40263e-09
B2	315	15745.6	2	5	3	0
B2	316	15757.1	0	1	15	0
A1	317	15787.8	1	4	7	7.14967e-10
A1	318	15796.3	4	4	1	2.11162e-10
A1	319	15802.7	4	3	3	1.34778e-09
B2	320	15831.2	4	2	5	0
B2	321	15847.8	5	3	1	0
A1	322	15858.9	4	3	3	3.09987e-09
B2	323	15860.9	4	1	7	0
B2	324	15881.4	0	1	15	0
A1	325	15884.4	4	3	3	8.67483e-10
A1	326	15902.7	3	3	5	2.13377e-11
B2	327	15937.3	3	4	3	0
A1	328	15945.7	2	2	9	2.66267e-10
B2	329	15947.8	0	7	4	0
A1	330	15948.3	0	7	4	6.51338e-11
A1	331	15951.6	4	4	1	5.0393e-12
A1	332	15966.5	3	3	5	2.09846e-11
B2	333	15970.9	3	2	7	0
A1	334	15983.1	8	1	0	1.95692e-12
B2	335	15983.1	8	1	0	0
B2	336	16053.4	2	1	11	0
A1	337	16058.7	2	3	7	1.38287e-12
A1	338	16141.1	0	6	6	9.60393e-13
B2	339	16141.1	0	6	6	0
A1	340	16170.4	7	1	2	1.15287e-08
B2	341	16170.4	7	1	2	0
A1	342	16187.7	1	2	11	3.54706e-09
A1	343	16294.6	5	0	8	4.07755e-10
B2	344	16296	5	0	8	0
A1	345	16323.1	9	0	1	1.96363e-09
B2	346	16323.1	9	0	1	0
A1	347	16324.4	0	0	18	2.8555e-10
A1	348	16335.4	1	6	4	1.38292e-10
B2	349	16335.4	1	6	4	0
A1	350	16349.6	2	7	0	2.5006e-10
B2	351	16349.9	7	2	0	0
B2	352	16390.9	0	3	12	0
A1	353	16408.2	0	0	18	2.57969e-11
A1	354	16457.8	1	5	6	1.0091e-11
B2	355	16464.6	1	5	6	0
B2	356	16480.4	0	4	10	0
A1	357	16480.5	6	2	2	1.35469e-11
A1	358	16482.9	6	2	2	6.49417e-13
B2	359	16483.7	2	6	2	0
A1	360	16532.9	2	4	6	8.23013e-13
B2	361	16564.6	3	1	10	0
A1	362	16564.9	3	6	0	5.20696e-13
A1	363	16568.9	0	8	3	4.82321e-17
B2	364	16569.1	0	8	3	0
A1	365	16569.8	3	6	0	3.95319e-14
A1	366	16589.2	1	1	14	7.99248e-09
B2	367	16595.1	2	5	4	0
B2	368	16597.9	6	3	0	0
B2	369	16601.7	0	1	16	0
A1	370	16636.9	1	4	8	3.79472e-09
A1	371	16644.4	4	4	2	5.05718e-13
A1	372	16653	4	3	4	9.70467e-10
B2	373	16684	4	2	6	0
B2	374	16700.1	5	3	2	0
A1	375	16708	4	5	0	4.57957e-10
A1	376	16713.2	4	5	0	8.94453e-13
B2	377	16723	4	1	8	0
B2	378	16730.6	3	2	8	0
A1	379	16735.6	4	3	4	6.74276e-11
A1	380	16761.1	3	3	6	3.22793e-11
A1	381	16793	0	7	5	1.7243e-13
B2	382	16793	0	7	5	0
B2	383	16794.5	3	4	4	0
A1	384	16804	4	4	2	3.70274e-12
A1	385	16813.1	2	2	10	1.78104e-12
A1	386	16817.2	8	1	1	1.47632e-15
B2	387	16817.2	8	1	1	0
A1	388	16827.7	3	3	6	2.53212e-13
B2	389	16828.3	5	4	0	0
B2	390	16835.5	3	2	8	0
A1	391	16885.8	10	0	0	7.13543e-14
B2	392	16885.8	10	0	0	0
B2	393	16922.9	2	1	12	0
A1	394	16925.1	2	3	8	8.15258e-16
A1	395	16986.4	0	6	7	4.13978e-11
B2	396	16986.5	0	6	7	0
B2	397	17009.4	7	1	3	0
A1	398	17009.4	7	1	3	6.87653e-10
A1	399	17059.4	1	2	12	1.71876e-09
A1	400	17136.7	5	0	9	3.91216e-10
B2	401	17138.7	5	0	9	0
A1	402	17152.1	9	0	2	1.35597e-10
B2	403	17152.1	9	0	2	0
A1	404	17161.5	0	0	19	5.21296e-10
A1	405	17176.8	1	6	5	1.63354e-10
B2	406	17176.9	1	6	5	0
A1	407	17185.2	2	7	1	7.75136e-13
B2	408	17185.5	7	2	1	0
B2	409	17232.4	0	3	13	0
A1	410	17247.3	0	0	19	3.41546e-11
A1	411	17293.4	1	5	7	9.9208e-12
B2	412	17304.4	1	5	7	0
A1	413	17317.3	6	2	3	2.51562e-13
B2	414	17320.8	2	6	3	0
B2	415	17322.6	2	6	3	0
A1	416	17324.2	6	2	3	1.99086e-12
A1	417	17372.6	1	5	7	2.8396e-13
A1	418	17398.5	3	6	1	2.57704e-10
B2	419	17405.3	0	8	4	0
A1	420	17405.6	0	8	4	4.12203e-11
A1	421	17406.6	3	6	1	6.71246e-10
B2	422	17409.6	3	1	11	0
B2	423	17430.6	9	1	0	0
A1	424	17430.6	9	1	0	4.91561e-10
A1	425	17431.1	1	1	15	3.45559e-11
B2	426	17435.1	6	3	1	0
B2	427	17439.1	2	5	5	0
B2	428	17444	0	1	17	0
A1	429	17484.1	4	3	5	2.45292e-11
A1	430	17486.8	4	4	3	2.94695e-11
A1	431	17502.9	4	3	5	2.30013e-12
B2	432	17531.4	5	3	3	0
B2	433	17547.5	5	3	3	0
A1	434	17548.4	4	5	1	9.16202e-13
A1	435	17561.2	4	5	1	9.86997e-13
B2	436	17575.6	2	1	13	0
B2	437	17582.3	3	2	9	0
A1	438	17583.5	4	3	5	4.34521e-14
A1	439	17617.9	3	3	7	3.7199e-14
A1	440	17634.9	0	7	6	1.87632e-14
B2	441	17635	0	7	6	0
A1	442	17644.6	8	1	2	4.44928e-10
B2	443	17644.6	8	1	2	0
B2	444	17645.4	3	4	5	0
A1	445	17651.1	4	4	3	3.79041e-11
B2	446	17670.3	5	4	1	0
A1	447	17678.1	2	2	11	1.60558e-10
A1	448	17686.8	3	3	7	2.71549e-10
B2	449	17696	3	2	9	0
A1	450	17707.4	10	0	1	7.08447e-11
B2	451	17707.4	10	0	1	0
B2	452	17792.8	3	1	11	0
A1	453	17794.5	2	4	9	1.4626e-14
B2	454	17830	0	6	8	0
A1	455	17830	0	6	8	8.02022e-12
B2	456	17841.4	7	1	4	0
A1	457	17841.4	7	1	4	3.75182e-12
A1	458	17851.4	2	8	0	1.09225e-13
B2	459	17851.5	8	2	0	0
A1	460	17937.3	1	3	13	2.08976e-13
A1	461	17966.2	0	0	20	1.79364e-13
B2	462	17978.5	5	0	10	0
A1	463	17987.4	5	0	10	7.72623e-15
B2	464	17988.6	9	0	3	0
A1	465	17988.7	9	0	3	6.52088e-15
A1	466	18010.4	1	6	6	1.2232e-11
B2	467	18010.8	1	6	6	0
A1	468	18012.4	2	7	2	7.63933e-14
B2	469	18012.7	7	2	2	0
B2	470	18069.4	0	2	16	0
A1	471	18083.8	0	0	20	1.1917e-11
A1	472	18123.2	5	2	6	1.64712e-11
A1	473	18135.4	3	7	0	4.83927e-12
B2	474	18140.2	2	5	6	0
A1	475	18146.1	6	2	4	5.28847e-14
B2	476	18147.6	7	3	0	0
B2	477	18152.4	2	6	4	0
A1	478	18169.7	0	0	20	3.70993e-13
B2	479	18173	0	1	18	0
A1	480	18208.7	1	5	8	2.58447e-13
A1	481	18224.4	3	6	2	1.6298e-14
B2	482	18230.3	0	11	0	0
A1	483	18230.3	0	11	0	1.1435e-14
A1	484	18237.1	3	6	2	1.39641e-14
B2	485	18251.1	9	1	1	0
A1	486	18251.1	9	1	1	6.42852e-16
B2	487	18258.8	0	8	5	0
A1	488	18259.5	0	8	5	5.84566e-16
B2	489	18260.1	0	8	5	0
B2	490	18265.1	6	3	2	0
B2	491	18279.4	2	5	6	0
A1	492	18283.5	5	5	0	1.91869e-11
A1	493	18292.2	1	1	16	3.77426e-10
B2	494	18303	0	1	18	0
A1	495	18322.6	4	4	4	5.28947e-10
A1	496	18330.7	5	2	6	1.12701e-10
A1	497	18356.1	4	3	6	1.67634e-11
B2	498	18375.3	5	3	4	0
A1	499	18382.2	4	5	2	8.35935e-11
B2	500	18386.7	4	6	0	0
B2	501	18398.8	5	3	4	0
A1	502	18416.3	4	3	6	2.74984e-11
B2	503	18445.6	2	1	14	0
A1	504	18447.1	2	2	12	9.11799e-15
B2	505	18447.2	3	2	10	0
A1	506	18474.5	8	1	3	4.19633e-12
B2	507	18474.7	8	1	3	0
A1	508	18478.8	3	3	8	1.17224e-12
A1	509	18494.9	4	4	4	8.85191e-16
B2	510	18497.6	3	4	6	0
B2	511	18508.6	5	4	2	0
A1	512	18517.9	0	7	7	3.26084e-12
B2	513	18517.9	0	7	7	0
A1	514	18530.5	5	5	0	5.04969e-11
A1	515	18546.1	3	3	8	1.49647e-10
A1	516	18556.6	2	2	12	7.55365e-11
A1	517	18559.2	10	0	2	4.06528e-12
B2	518	18559.2	10	0	2	0
B2	519	18566.4	3	2	10	0
A1	520	18667.5	2	4	10	2.85553e-12
A1	521	18669.2	2	8	1	2.86684e-12
B2	522	18669.3	8	2	1	0
B2	523	18678.8	2	1	14	0
B2	524	18691	7	1	5	0
A1	525	18691	7	1	5	2.04096e-13
B2	526	18758.7	0	6	9	0
A1	527	18758.8	0	6	9	5.39789e-14
A1	528	18825.3	10	1	0	5.16804e-14
B2	529	18825.3	10	1	0	0
A1	530	18825.7	1	3	14	3.24116e-15
A1	531	18839.1	2	7	3	3.99983e-11
B2	532	18839.7	7	2	3	0
A1	533	18860.8	9	0	4	2.10744e-12
B2	534	18860.9	9	0	4	0
A1	535	18890.9	1	6	7	1.53876e-11
B2	536	18892.2	1	6	7	0
A1	537	18951.6	3	7	1	2.22477e-11
A1	538	18962.6	5	0	11	6.17126e-12
B2	539	18963.4	5	0	11	0
B2	540	18965.7	7	3	1	0
A1	541	18987.2	3	6	3	1.41972e-13
A1	542	18987.7	0	0	21	2.21061e-13
B2	543	19002.4	2	6	5	0
A1	544	19052.1	4	4	5	2.32135e-13
A1	545	19055.8	3	6	3	5.04076e-14
B2	546	19056.2	2	5	7	0
B2	547	19067.1	0	1	19	0
B2	548	19073.9	9	1	2	0
A1	549	19074.1	9	1	2	3.6737e-16
A1	550	19092	0	3	15	7.93168e-15
B2	551	19096.7	6	3	3	0
A1	552	19098.3	0	11	1	3.90866e-12
B2	553	19098.6	0	11	1	0
A1	554	19101.9	5	5	1	3.26169e-13
A1	555	19112.6	5	5	1	8.39308e-12
B2	556	19132.8	0	4	13	0
B2	557	19142.4	0	8	6	0
A1	558	19143.6	0	8	6	8.38152e-12
A1	559	19152.4	4	5	3	2.19116e-12
B2	560	19163.1	5	3	5	0
B2	561	19182.2	4	2	9	0
A1	562	19196.2	4	5	3	4.84407e-14
A1	563	19203.9	2	0	17	9.13496e-14
B2	564	19208.2	4	6	1	0
A1	565	19223.4	4	3	7	8.91943e-14
A1	566	19231	4	5	3	1.34847e-14
B2	567	19237.8	5	3	5	0
B2	568	19264.2	2	5	7	0
A1	569	19273.2	1	3	13	1.06319e-15
A1	570	19298.7	9	2	0	3.2656e-15
B2	571	19298.8	9	2	0	0
A1	572	19305.4	4	4	5	7.97973e-12
B2	573	19314.1	2	1	15	0
A1	574	19326.3	8	1	4	8.36105e-11
B2	575	19326.9	8	1	4	0
A1	576	19332	3	3	9	1.004e-10
B2	577	19335.2	5	4	3	0
A1	578	19350.8	5	5	1	1.95667e-11
B2	579	19353.3	3	4	7	0
A1	580	19356.7	5	5	1	2.75189e-12
B2	581	19385.9	3	2	11	0
A1	582	19409	3	3	9	1.3057e-11
B2	583	19419.2	0	7	8	0
A1	584	19422.7	0	7	8	4.13002e-12
B2	585	19429.8	4	2	9	0
A1	586	19441.5	1	0	19	2.43199e-15
B2	587	19489.8	8	2	2	0
A1	588	19489.8	2	8	2	3.77751e-13
A1	589	19526.5	2	2	13	1.27774e-13
B2	590	19546.5	0	12	0	0
A1	591	19546.5	0	12	0	1.57245e-11
B2	592	19552.3	0	12	0	0
A1	593	19552.3	0	12	0	2.91409e-11
B2	594	19553.4	0	2	17	0
A1	595	19562.7	7	1	6	1.20966e-11
B2	596	19564	7	1	6	0
A1	597	19581.5	1	0	19	5.75588e-13
A1	598	19645.1	3	8	0	3.40874e-13
B2	599	19647.8	8	3	0	0
A1	600	19675.2	10	1	1	3.01938e-13
B2	601	19675.6	10	1	1	0
A1	602	19677.8	10	1	1	1.78371e-14
B2	603	19678.2	7	2	4	0
A1	604	19679.1	0	6	10	1.96261e-15
B2	605	19680.7	0	6	10	0
B2	606	19708.4	3	1	13	0
A1	607	19749.2	2	4	11	7.57389e-12
A1	608	19762.8	3	7	2	2.46266e-12
B2	609	19779.3	2	6	6	0
B2	610	19782.2	7	3	2	0
A1	611	19784	6	2	6	8.6273e-15
A1	612	19829.5	5	6	0	5.22712e-13
A1	613	19832.4	3	6	4	3.54679e-13
B2	614	19865.5	6	3	4	0
A1	615	19876.7	0	0	22	9.80554e-14
B2	616	19892.2	0	4	12	0
A1	617	19895	0	4	12	5.48831e-15
A1	618	19899.3	5	5	2	7.965e-15
B2	619	19903.5	7	4	0	0
A1	620	19930.5	5	5	2	1.02262e-14
B2	621	19939.1	6	3	4	0
A1	622	19941.3	1	3	15	1.29937e-12
A1	623	19948.4	4	4	6	1.78065e-15
B2	624	19966.3	2	5	8	0
B2	625	19967.4	0	1	20	0
B2	626	19975.4	0	11	2	0
A1	627	19975.5	0	11	2	9.5424e-13
